# Supplementary material
Source: MDPI journal article supplement (https://www.mdpi.com/2071-1050/13/3/1570)
Supplement: s1 [file s1]

## Sheet: productivity
NR	Datum	Cascade	Cubitainer	Productivity	Large scale	DS	Temp	uur	KWH	RGR	MAX	DT
1	2018-04-30	PP	1	5.0782	8.88685	9.14076	10.9	3.1119	21.9615	0.120591	0.178596	3.88108
2	2018-04-30	PP	2	3.81271	6.67223	6.86287	10.9	3.1119	21.9615	0.0972221	0.121061	0.0315273
3	2018-04-30	PP	3	4.22674	7.39679	7.60813	10.9	3.1119	21.9615	0.108528	GEM	STDV
4	2018-04-30	SM	1	2.54672	4.45676	4.5841	10.9	3.1119	21.9615	0.0698512
5	2018-04-30	SM	2	2.16407	3.78713	3.89533	10.9	3.1119	21.9615	0.0644457
6	2018-04-30	SM	3	3.21226	5.62146	5.78207	10.9	3.1119	21.9615	0.0899763
7	2018-04-30	PM	1	7.83769	13.716	14.1078	10.9	3.1119	21.9615	0.050535
8	2018-04-30	PM	2	7.52079	13.1614	13.5374	10.9	3.1119	21.9615	0.0446389
9	2018-04-30	PM	3	7.31855	12.8075	13.1734	10.9	3.1119	21.9615	0.0407446
10	2018-05-07	PP	1	5.60902	9.81578	10.0962	13.4	12.1857	41.5817	0.104917
11	2018-05-07	PP	2	5.36979	9.39713	9.66562	13.4	12.1857	41.5817	0.102199
12	2018-05-07	PP	3	4.83099	8.45424	8.69579	13.4	12.1857	41.5817	0.0911163
13	2018-05-07	SM	1	5.5689	9.74557	10.024	13.4	12.1857	41.5817	0.115948
14	2018-05-07	SM	2	4.36553	7.63968	7.85796	13.4	12.1857	41.5817	0.0983239
15	2018-05-07	SM	3	3.76933	6.59632	6.78479	13.4	12.1857	41.5817	0.0795546
16	2018-05-07	PM	1	3.48639	6.10119	6.27551	13.4	12.1857	41.5817	0.074917
17	2018-05-07	PM	2	3.97138	6.94991	7.14848	13.4	12.1857	41.5817	0.071405
18	2018-05-14	PP	1	5.51621	9.65336	9.92917	14.2857	7.91429	31.7042	0.120661
19	2018-05-14	PP	2	5.55888	9.72804	10.006	14.2857	7.91429	31.7042	0.114837
20	2018-05-14	PP	3	5.36348	9.38609	9.65426	14.2857	7.91429	31.7042	0.1127
21	2018-05-14	SM	1	4.97931	8.71379	8.96276	14.2857	7.91429	31.7042	0.116194
22	2018-05-14	SM	2	4.12398	7.21696	7.42316	14.2857	7.91429	31.7042	0.100672
23	2018-05-14	SM	3	4.46122	7.80713	8.03019	14.2857	7.91429	31.7042	0.10379
24	2018-05-14	PM	1	5.5046	9.63304	9.90827	14.2857	7.91429	31.7042	0.104353
25	2018-05-14	PM	2	4.26479	7.46339	7.67663	14.2857	7.91429	31.7042	0.0805497
26	2018-05-14	PM	3	8.54883	14.9605	15.3879	14.2857	7.91429	31.7042	0.066341
27	2018-05-22	PP	1	6.79766	11.8959	12.2358	12.7429	7.58333	36.7334	0.168918
28	2018-05-22	PP	2	5.57005	9.74759	10.0261	12.7429	7.58333	36.7334	0.140448
29	2018-05-22	PP	3	5.49415	9.61476	9.88947	12.7429	7.58333	36.7334	0.13836
30	2018-05-22	SM	1	5.24488	9.17854	9.44078	12.7429	7.58333	36.7334	0.139308
31	2018-05-22	SM	2	5.11034	8.94309	9.19861	12.7429	7.58333	36.7334	0.139749
32	2018-05-22	SM	3	4.53208	7.93114	8.15774	12.7429	7.58333	36.7334	0.125796
33	2018-05-22	PM	1	5.66603	9.91556	10.1989	12.7429	7.58333	36.7334	0.117805
34	2018-05-22	PM	2	5.09654	8.91895	9.17378	12.7429	7.58333	36.7334	0.116978
35	2018-05-22	PM	3	3.58442	6.27273	6.45195	12.7429	7.58333	36.7334	0.0833025
36	2018-05-28	PP	1	7.26974	12.722	13.0855	19.6429	8.22857	38.1819	0.141527
37	2018-05-28	PP	2	6.94011	12.1452	12.4922	19.6429	8.22857	38.1819	0.125603
38	2018-05-28	PP	3	7.49741	13.1205	13.4953	19.6429	8.22857	38.1819	0.128442
39	2018-05-28	SM	1	6.93371	12.134	12.4807	19.6429	8.22857	38.1819	0.131291
40	2018-05-28	SM	2	5.35936	9.37889	9.64685	19.6429	8.22857	38.1819	0.112497
41	2018-05-28	SM	3	7.25609	12.6981	13.061	19.6429	8.22857	38.1819	0.139733
42	2018-05-28	PM	1	5.43872	9.51777	9.7897	19.6429	8.22857	38.1819	0.0890538
43	2018-05-28	PM	2	7.00033	12.2506	12.6006	19.6429	8.22857	38.1819	0.121916
44	2018-05-28	PM	3	6.11252	10.6969	11.0025	19.6429	8.22857	38.1819	0.110288
45	2018-06-04	PP	1	5.04421	8.82736	9.07957	17.9571	4.86667	28.5903	0.132935
46	2018-06-04	PP	2	5.38734	9.42785	9.69722	17.9571	4.86667	28.5903	0.128663
47	2018-06-04	PP	3	5.33225	9.33144	9.59805	17.9571	4.86667	28.5903	0.132125
48	2018-06-04	SM	1	5.17739	9.06044	9.31931	17.9571	4.86667	28.5903	0.127491
49	2018-06-04	SM	2	5.96305	10.4353	10.7335	17.9571	4.86667	28.5903	0.139644
50	2018-06-04	SM	3	4.1423	7.24903	7.45615	17.9571	4.86667	28.5903	0.105627
51	2018-06-04	PM	1	6.46187	11.3083	11.6314	17.9571	4.86667	28.5903	0.136399
52	2018-06-04	PM	2	6.63871	11.6177	11.9497	17.9571	4.86667	28.5903	0.140202
53	2018-06-04	PM	3	7.38512	12.924	13.2932	17.9571	4.86667	28.5903	0.14301
54	2018-06-11	PP	1	6.17211	10.8012	11.1098	17.2714	7.64762	37.4986	0.156044
55	2018-06-11	PP	2	6.06193	10.6084	10.9115	17.2714	7.64762	37.4986	0.14246
56	2018-06-11	PP	3	6.66659	11.6665	11.9999	17.2714	7.64762	37.4986	0.152745
57	2018-06-11	SM	1	6.57469	11.5057	11.8344	17.2714	7.64762	37.4986	0.158201
58	2018-06-11	SM	2	6.01436	10.5251	10.8258	17.2714	7.64762	37.4986	0.141707
59	2018-06-11	SM	3	5.65565	9.8974	10.1802	17.2714	7.64762	37.4986	0.1383
60	2018-06-11	PM	1	7.81764	13.6809	14.0718	17.2714	7.64762	37.4986	0.149542
61	2018-06-11	PM	2	8.60156	15.0527	15.4828	17.2714	7.64762	37.4986	0.167109
62	2018-06-11	PM	3	8.03889	14.0681	14.47	17.2714	7.64762	37.4986	0.161245
63	2018-06-18	PP	1	6.20378	10.8566	11.1668	16	5.83333	31.9845	0.148218
64	2018-06-18	PP	2	5.95066	10.4137	10.7112	16	5.83333	31.9845	0.132667
65	2018-06-18	PP	3	6.10115	10.677	10.9821	16	5.83333	31.9845	0.124361
66	2018-06-18	SM	1	6.45438	11.2952	11.6179	16	5.83333	31.9845	0.149768
67	2018-06-18	SM	2	6.04615	10.5808	10.8831	16	5.83333	31.9845	0.138635
68	2018-06-18	SM	3	6.11464	10.7006	11.0064	16	5.83333	31.9845	0.14133
69	2018-06-18	PM	1	7.95649	13.9239	14.3217	16	5.83333	31.9845	0.146686
70	2018-06-18	PM	2	8.4127	14.7222	15.1429	16	5.83333	31.9845	0.154172
71	2018-06-18	PM	3	9.50319	16.6306	17.1057	16	5.83333	31.9845	0.174932
72	2018-06-25	PP	1	6.72407	11.7671	12.1033	16.2286	9.66905	44.2682	0.149365
73	2018-06-25	PP	2	6.78484	11.8735	12.2127	16.2286	9.66905	44.2682	0.140908
74	2018-06-25	PP	3	5.16057	9.03099	9.28902	16.2286	9.66905	44.2682	0.112212
75	2018-06-25	SM	1	6.75687	11.8245	12.1624	16.2286	9.66905	44.2682	0.156996
76	2018-06-25	SM	2	6.18456	10.823	11.1322	16.2286	9.66905	44.2682	0.146884
77	2018-06-25	SM	3	6.17834	10.8121	11.121	16.2286	9.66905	44.2682	0.142283
78	2018-06-25	PM	1	6.87864	12.0376	12.3815	16.2286	9.66905	44.2682	0.131939
79	2018-06-25	PM	2	8.06651	14.1164	14.5197	16.2286	9.66905	44.2682	0.153073
80	2018-06-25	PM	3	7.98995	13.9824	14.3819	16.2286	9.66905	44.2682	0.145259
81	2018-07-02	PP	1	7.63864	13.3676	13.7496	21.1286	15.0476	55.59	0.163366
82	2018-07-02	PP	2	7.1277	12.4735	12.8299	21.1286	15.0476	55.59	0.149408
83	2018-07-02	PP	3	6.72585	11.7702	12.1065	21.1286	15.0476	55.59	0.136549
84	2018-07-02	SM	1	7.56568	13.2399	13.6182	21.1286	15.0476	55.59	0.164869
85	2018-07-02	SM	2	6.52321	11.4156	11.7418	21.1286	15.0476	55.59	0.149813
86	2018-07-02	SM	3	6.32372	11.0665	11.3827	21.1286	15.0476	55.59	0.146672
87	2018-07-02	PM	1	6.95662	12.1741	12.5219	21.1286	15.0476	55.59	0.128967
88	2018-07-02	PM	2	9.80238	17.1542	17.6443	21.1286	15.0476	55.59	0.169777
89	2018-07-02	PM	3	5.07211	8.87619	9.12979	21.1286	15.0476	55.59	0.105469
90	2018-07-09	PP	1	7.87869	13.7877	14.1816	21.1714	13.2262	48.5433	0.172195
91	2018-07-09	PP	2	7.49764	13.1209	13.4958	21.1714	13.2262	48.5433	0.165874
92	2018-07-09	PP	3	7.22624	12.6459	13.0072	21.1714	13.2262	48.5433	0.15069
93	2018-07-09	SM	1	7.29683	12.7694	13.1343	21.1714	13.2262	48.5433	0.169897
94	2018-07-09	SM	2	8.06408	14.1121	14.5154	21.1714	13.2262	48.5433	0.175679
95	2018-07-09	SM	3	6.58803	11.529	11.8584	21.1714	13.2262	48.5433	0.158366
96	2018-07-09	PM	1	9.62618	16.8458	17.3271	21.1714	13.2262	48.5433	0.174922
97	2018-07-09	PM	2	9.80476	17.1583	17.6486	21.1714	13.2262	48.5433	0.162283
98	2018-07-09	PM	3	9.6494	16.8864	17.3689	21.1714	13.2262	48.5433	0.178596
99	2018-07-16	PP	1	5.92702	10.3723	10.6686	19.6571	9.15952	38.3397	0.145488
100	2018-07-16	PP	2	6.63083	11.604	11.9355	19.6571	9.15952	38.3397	0.151857
101	2018-07-16	PP	3	4.89415	8.56476	8.80947	19.6571	9.15952	38.3397	0.115712
102	2018-07-16	SM	1	4.80184	8.40322	8.64331	19.6571	9.15952	38.3397	0.128124
103	2018-07-16	SM	2	6.33466	11.0856	11.4024	19.6571	9.15952	38.3397	0.148184
104	2018-07-16	SM	3	4.75317	8.31805	8.5557	19.6571	9.15952	38.3397	0.122795
105	2018-07-16	PM	1	8.09764	14.1709	14.5758	19.6571	9.15952	38.3397	0.147104
106	2018-07-16	PM	2	7.40015	12.9503	13.3203	19.6571	9.15952	38.3397	0.133066
107	2018-07-16	PM	3	6.4568	11.2994	11.6222	19.6571	9.15952	38.3397	0.113678
108	2018-07-23	PP	1	7.73332	13.5333	13.92	20.5857	10.8262	41.2953	0.170835
109	2018-07-23	PP	2	7.7217	13.513	13.8991	20.5857	10.8262	41.2953	0.168355
110	2018-07-23	PP	3	7.95113	13.9145	14.312	20.5857	10.8262	41.2953	0.148844
111	2018-07-23	SM	1	6.43551	11.2621	11.5839	20.5857	10.8262	41.2953	0.152955
112	2018-07-23	SM	2	7.44871	13.0353	13.4077	20.5857	10.8262	41.2953	0.166398
113	2018-07-23	SM	3	4.51083	7.89395	8.11949	20.5857	10.8262	41.2953	0.12213
114	2018-07-23	PM	1	6.08748	10.6531	10.9575	20.5857	10.8262	41.2953	0.115252
115	2018-07-23	PM	2	8.61668	15.0792	15.51	20.5857	10.8262	41.2953	0.14906
116	2018-07-23	PM	3	6.18092	10.8166	11.1257	20.5857	10.8262	41.2953	0.107307
117	2018-07-30	PP	1	6.85319	11.9931	12.3357	23.9	9.47857	37.5093	0.158539
118	2018-07-30	PP	2	6.6196	11.5843	11.9153	23.9	9.47857	37.5093	0.157568
119	2018-07-30	PP	3	5.01997	8.78495	9.03595	23.9	9.47857	37.5093	0.140563
120	2018-07-30	SM	1	4.57706	8.00986	8.23872	23.9	9.47857	37.5093	0.12164
121	2018-07-30	SM	2	5.5845	9.77288	10.0521	23.9	9.47857	37.5093	0.139728
122	2018-07-30	SM	3	3.77125	6.59969	6.78826	23.9	9.47857	37.5093	0.101713
123	2018-07-30	PM	1	4.1639	7.28683	7.49502	23.9	9.47857	37.5093	0.0913705
124	2018-07-30	PM	2	8.92674	15.6218	16.0681	23.9	9.47857	37.5093	0.151262
125	2018-07-30	PM	3	6.6346	11.6106	11.9423	23.9	9.47857	37.5093	0.11962
126	2018-08-06	PP	1	7.65312	13.393	13.7756	21.9571	13.1405	46.2075	0.178543
127	2018-08-06	PP	2	7.64827	13.3845	13.7669	21.9571	13.1405	46.2075	0.177928
128	2018-08-06	PP	3	7.02721	12.2976	12.649	21.9571	13.1405	46.2075	0.164929
129	2018-08-06	SM	1	6.591	11.5343	11.8638	21.9571	13.1405	46.2075	0.162397
130	2018-08-06	SM	2	5.97969	10.4645	10.7634	21.9571	13.1405	46.2075	0.149593
131	2018-08-06	SM	3	4.26864	7.47012	7.68356	21.9571	13.1405	46.2075	0.115076
132	2018-08-06	PM	1	DO	DO	DO	21.9571	13.1405	46.2075	DO
133	2018-08-06	PM	2	5.29412	9.26472	9.52942	21.9571	13.1405	46.2075	0.114425
134	2018-08-06	PM	3	8.42755	14.7482	15.1696	21.9571	13.1405	46.2075	0.146163
135	2018-08-13	PP	1	4.72294	8.26515	8.5013	19.1	6.71429	29.4631	0.130043
136	2018-08-13	PP	2	5.36407	9.38712	9.65532	19.1	6.71429	29.4631	0.144812
137	2018-08-13	PP	3	5.22917	9.15105	9.41251	19.1	6.71429	29.4631	0.140167
138	2018-08-13	SM	1	4.1873	7.32778	7.53714	19.1	6.71429	29.4631	0.116814
139	2018-08-13	SM	2	4.05821	7.10186	7.30477	19.1	6.71429	29.4631	0.111986
140	2018-08-13	SM	3	2.91463	5.1006	5.24634	19.1	6.71429	29.4631	0.0879415
141	2018-08-13	PM	1	DO	DO	DO	19.1	6.71429	29.4631	DO
142	2018-08-13	PM	2	3.29055	5.75847	5.92299	19.1	6.71429	29.4631	0.0827687
143	2018-08-13	PM	3	6.80252	11.9044	12.2445	19.1	6.71429	29.4631	0.135786
144	2018-08-20	PP	1	4.87712	8.53496	8.77882	18.5143	4.85476	26.3092	0.145991
145	2018-08-20	PP	2	4.72135	8.26236	8.49843	18.5143	4.85476	26.3092	0.136497
146	2018-08-20	PP	3	4.8046	8.40806	8.64829	18.5143	4.85476	26.3092	0.129923
147	2018-08-20	SM	1	3.68933	6.45633	6.6408	18.5143	4.85476	26.3092	0.11434
148	2018-08-20	SM	2	3.31841	5.80722	5.97314	18.5143	4.85476	26.3092	0.0958776
149	2018-08-20	SM	3	3.08877	5.40534	5.55978	18.5143	4.85476	26.3092	0.102512
150	2018-08-20	PM	1	2.4817	4.34297	4.46705	18.5143	4.85476	26.3092	0.0770987
151	2018-08-20	PM	2	DO	DO	DO	18.5143	4.85476	26.3092	DO
152	2018-08-20	PM	3	DO	DO	DO	18.5143	4.85476	26.3092	DO
153	2018-08-27	PP	1	3.3889	5.93057	6.10001	16.2167	4.61429	24.1194	0.109955
154	2018-08-27	PP	2	3.49585	6.11775	6.29254	16.2167	4.61429	24.1194	0.115227
155	2018-08-27	PP	3	4.02486	7.0435	7.24474	16.2167	4.61429	24.1194	0.0893586
156	2018-08-27	SM	1	2.6658	4.66515	4.79844	16.2167	4.61429	24.1194	0.0995765
157	2018-08-27	SM	2	3.94805	6.90908	7.10649	16.2167	4.61429	24.1194	0.107125
158	2018-08-27	SM	3	3.14778	5.50862	5.666	16.2167	4.61429	24.1194	0.103272
165	2018-08-27	PM	1	DO	DO	DO	16.2167	4.61429	24.1194	DO
166	2018-08-27	PM	2	DO	DO	DO	16.2167	4.61429	24.1194	DO
167	2018-08-27	PM	3	DO	DO	DO	16.2167	4.61429	24.1194	DO
159	2018-09-03	PP	1	4.40761	7.71332	7.9337	15.8429	6.44524	25.5482	0.132335
160	2018-09-03	PP	2	3.36848	5.89484	6.06326	15.8429	6.44524	25.5482	0.111384
161	2018-09-03	PP	3	2.88854	5.05495	5.19937	15.8429	6.44524	25.5482	0.115277
162	2018-09-03	SM	1	4.50715	7.88751	8.11286	15.8429	6.44524	25.5482	0.146153
163	2018-09-03	SM	2	2.80548	4.9096	5.04987	15.8429	6.44524	25.5482	0.0722414
164	2018-09-03	SM	3	2.8014	4.90246	5.04253	15.8429	6.44524	25.5482	0.0891061
165	2018-09-03	PM	1	DO	DO	DO	15.8429	6.44524	25.5482	DO
166	2018-09-03	PM	2	DO	DO	DO	15.8429	6.44524	25.5482	DO
167	2018-09-03	PM	3	DO	DO	DO	15.8429	6.44524	25.5482	DO
168	2018-09-10	PP	1	4.66522	8.16414	8.3974	17.1429	5.49048	24.3435	0.131161
169	2018-09-10	PP	2	5.12434	8.96759	9.22381	17.1429	5.49048	24.3435	0.150379
170	2018-09-10	PP	3	1.36624	2.39091	2.45923	17.1429	5.49048	24.3435	0.0904539
171	2018-09-10	SM	1	5.45067	9.53867	9.8112	17.1429	5.49048	24.3435	0.147511
172	2018-09-10	SM	2	5.81709	10.1799	10.4708	17.1429	5.49048	24.3435	0.143273
173	2018-09-10	SM	3	5.87544	10.282	10.5758	17.1429	5.49048	24.3435	0.151783
174	2018-09-10	PM	1	4.22465	7.39313	7.60436	17.1429	5.49048	24.3435	0.0390792
175	2018-09-10	PM	2	6.7436	11.8013	12.1385	17.1429	5.49048	24.3435	0.105887
176	2018-09-10	PM	3	6.71177	11.7456	12.0812	17.1429	5.49048	24.3435	0.105212
177	2018-09-17	PP	1	3.56418	6.23731	6.41552	15.2429	7.50952	24.157	0.103622
178	2018-09-17	PP	2	2.43337	4.25839	4.38006	15.2429	7.50952	24.157	0.0804829
179	2018-09-17	PP	3	4.03491	7.06109	7.26284	15.2429	7.50952	24.157	0.0997722
180	2018-09-17	SM	1	4.35826	7.62696	7.84487	15.2429	7.50952	24.157	0.120341
181	2018-09-17	SM	2	3.58252	6.26941	6.44853	15.2429	7.50952	24.157	0.105078
182	2018-09-17	SM	3	5.52167	9.66292	9.939	15.2429	7.50952	24.157	0.136227
183	2018-09-17	PM	1	DO	DO	DO	15.2429	7.50952	24.157	DO
184	2018-09-17	PM	2	3.8488	6.73541	6.92785	15.2429	7.50952	24.157	0.106887
185	2018-09-17	PM	3	3.20244	5.60427	5.76439	15.2429	7.50952	24.157	0.0962219
186	2018-09-24	PP	1	3.41803	5.98155	6.15246	15.1	5.93571	20.9825	0.108232
187	2018-09-24	PP	2	3.83785	6.71623	6.90812	15.1	5.93571	20.9825	0.129555
188	2018-09-24	PP	3	3.86511	6.76395	6.95721	15.1	5.93571	20.9825	0.117682
189	2018-09-24	SM	1	3.69817	6.4718	6.65671	15.1	5.93571	20.9825	0.110041
190	2018-09-24	SM	2	1.87795	3.28642	3.38031	15.1	5.93571	20.9825	0.0685385
191	2018-09-24	SM	3	2.33752	4.09066	4.20754	15.1	5.93571	20.9825	0.0679946
192	2018-09-24	PM	1	3.12387	5.46677	5.62296	15.1	5.93571	20.9825	0.0934582
193	2018-09-24	PM	2	2.47856	4.33748	4.46141	15.1	5.93571	20.9825	0.0756065
194	2018-09-24	PM	3	2.52082	4.41143	4.53747	15.1	5.93571	20.9825	0.080963
195	2018-10-01	PP	1	3.4586	6.05255	6.22548	10.7714	8.52857	25.208	0.111623
196	2018-10-01	PP	2	4.16347	7.28607	7.49425	10.7714	8.52857	25.208	0.126371
197	2018-10-01	PP	3	3.17498	5.55622	5.71497	10.7714	8.52857	25.208	0.0928431
198	2018-10-01	SM	1	1.64984	2.88722	2.96971	10.7714	8.52857	25.208	0.0612367
199	2018-10-01	SM	2	3.27698	5.73471	5.89856	10.7714	8.52857	25.208	0.119749
200	2018-10-01	SM	3	2.3137	4.04898	4.16466	10.7714	8.52857	25.208	0.0822134
201	2018-10-01	PM	1	4.02998	7.05247	7.25397	10.7714	8.52857	25.208	0.109349
202	2018-10-01	PM	2	4.93146	8.63005	8.87662	10.7714	8.52857	25.208	0.136486
203	2018-10-01	PM	3	4.68477	8.19835	8.43259	10.7714	8.52857	25.208	0.123877
204	2018-10-08	PP	1	2.62757	4.59825	4.72963	12.9857	7.21667	20.4994	0.0888524
205	2018-10-08	PP	2	2.07817	3.6368	3.74071	12.9857	7.21667	20.4994	0.0690825
206	2018-10-08	PP	3	1.9012	3.3271	3.42216	12.9857	7.21667	20.4994	0.0664609
207	2018-10-08	SM	1	1.68422	2.94738	3.03159	12.9857	7.21667	20.4994	0.0584998
208	2018-10-08	SM	2	1.48289	2.59506	2.6692	12.9857	7.21667	20.4994	0.0626174
209	2018-10-08	SM	3	0.874863	1.53101	1.57475	12.9857	7.21667	20.4994	0.0356661
210	2018-10-08	PM	1	2.99897	5.2482	5.39815	12.9857	7.21667	20.4994	0.0737101
211	2018-10-08	PM	2	3.3345	5.83538	6.00211	12.9857	7.21667	20.4994	0.0876782
212	2018-10-08	PM	3	2.84218	4.97381	5.11592	12.9857	7.21667	20.4994	0.0800746
213	2018-10-15	PP	1	2.75714	4.82499	4.96285	17.1286	9.07143	20.4812	0.0880092
214	2018-10-15	PP	2	1.82425	3.19243	3.28365	17.1286	9.07143	20.4812	0.0608099
215	2018-10-15	PP	3	1.93754	3.39069	3.48757	17.1286	9.07143	20.4812	0.0635052
216	2018-10-15	SM	1	3.37113	5.89947	6.06803	17.1286	9.07143	20.4812	0.107175
217	2018-10-15	SM	2	3.61266	6.32216	6.50279	17.1286	9.07143	20.4812	0.110859
218	2018-10-15	SM	3	2.5603	4.48052	4.60854	17.1286	9.07143	20.4812	0.098089
219	2018-10-15	PM	1	5.42468	9.4932	9.76443	17.1286	9.07143	20.4812	0.116728
220	2018-10-15	PM	2	5.18823	9.07941	9.33882	17.1286	9.07143	20.4812	0.130519
221	2018-10-15	PM	3	5.45192	9.54086	9.81346	17.1286	9.07143	20.4812	0.134158

## Sheet: Content
NR	Datum	Cascade	Cubitainer	N content	FOS	P content	Protein content	N uptake	P uptake	ProteinProduction	Temp	day length	lightenergy	Solar irradiance
24	2018-05-14	PP	1	59.5	16064.1	16.0641	0.38675	328.214	88.613	3.58984	14.2857	7.91429	4529.17	31.7042
25	2018-05-14	PP	2	56.02	14189.4	14.1894	0.36413	311.409	78.8772	3.40603	14.2857	7.91429	4529.17	31.7042
26	2018-05-14	PP	3	51.75	12002	12.002	0.336375	277.56	64.3723	3.03581	14.2857	7.91429	4529.17	31.7042
27	2018-05-14	SM	1	59.81	16605	16.605	0.388765	297.813	82.6816	3.25732	14.2857	7.91429	4529.17	31.7042
28	2018-05-14	SM	2	56.61	15333.5	15.3335	0.367965	233.459	63.2352	2.55345	14.2857	7.91429	4529.17	31.7042
29	2018-05-14	SM	3	54.78	14517.1	14.5171	0.35607	244.386	64.7642	2.67297	14.2857	7.91429	4529.17	31.7042
30	2018-05-14	PM	1	57.58	8906.4	8.9064	0.37427	316.955	49.0262	3.46669	14.2857	7.91429	4529.17	31.7042
31	2018-05-14	PM	2	53.15	8858.27	8.85827	0.345475	226.674	37.7787	2.47924	14.2857	7.91429	4529.17	31.7042
32	2018-05-14	PM	3	34.06	3216.83	3.21683	0.22139	291.173	27.5001	3.18471	14.2857	7.91429	4529.17	31.7042
33	2018-05-22	PP	1	49.65			0.322725	337.504		3.69145	12.7429	7.58333	5247.63	36.7334
34	2018-05-22	PP	2	48.82			0.31733	271.93		2.97423	12.7429	7.58333	5247.63	36.7334
35	2018-05-22	PP	3	48.17			0.313105	264.653		2.89464	12.7429	7.58333	5247.63	36.7334
36	2018-05-22	SM	1	53.07			0.344955	278.346		3.04441	12.7429	7.58333	5247.63	36.7334
37	2018-05-22	SM	2	53.09			0.345085	271.308		2.96743	12.7429	7.58333	5247.63	36.7334
38	2018-05-22	SM	3	52.52			0.34138	238.025		2.6034	12.7429	7.58333	5247.63	36.7334
39	2018-05-22	PM	1	56.62			0.36803	320.811		3.50887	12.7429	7.58333	5247.63	36.7334
40	2018-05-22	PM	2	54.08			0.35152	275.621		3.01461	12.7429	7.58333	5247.63	36.7334
41	2018-05-22	PM	3	42.44			0.27586	152.123		1.66384	12.7429	7.58333	5247.63	36.7334
42	2018-05-28	PP	1	47.16	12418.7	12.4187	0.30654	342.841	90.2806	3.74982	19.6429	8.22857	5454.56	38.1819
43	2018-05-28	PP	2	47.14	11479.8	11.4798	0.30641	327.157	79.6712	3.57828	19.6429	8.22857	5454.56	38.1819
44	2018-05-28	PP	3	42.23	10319.6	10.3196	0.274495	316.616	77.3702	3.46298	19.6429	8.22857	5454.56	38.1819
45	2018-05-28	SM	1	54.49	14893.5	14.8935	0.354185	377.818	103.267	4.13238	19.6429	8.22857	5454.56	38.1819
46	2018-05-28	SM	2	54.58	13130.6	13.1306	0.35477	292.514	70.3718	3.19937	19.6429	8.22857	5454.56	38.1819
47	2018-05-28	SM	3	51.9	12584.5	12.5845	0.33735	376.591	91.3144	4.11896	19.6429	8.22857	5454.56	38.1819
48	2018-05-28	PM	1	62.74	15108.7	15.1087	0.40781	341.226	82.1721	3.73215	19.6429	8.22857	5454.56	38.1819
49	2018-05-28	PM	2	59.68	14358.8	14.3588	0.38792	417.78	100.517	4.56946	19.6429	8.22857	5454.56	38.1819
50	2018-05-28	PM	3	52.11	10251.8	10.2518	0.338715	318.523	62.6642	3.48385	19.6429	8.22857	5454.56	38.1819
51	2018-06-04	PP	1	46.19	11352.3	11.3523	0.300235	232.992	57.2635	2.54835	17.9571	4.86667	4084.33	28.5903
52	2018-06-04	PP	2	46.6	11287.4	11.2874	0.3029	251.05	60.8091	2.74586	17.9571	4.86667	4084.33	28.5903
53	2018-06-04	PP	3	44.71	10880.3	10.8803	0.290615	238.405	58.0166	2.60755	17.9571	4.86667	4084.33	28.5903
54	2018-06-04	SM	1	57.27	16062.8	16.0628	0.372255	296.509	83.1633	3.24307	17.9571	4.86667	4084.33	28.5903
55	2018-06-04	SM	2	56.88	14965.6	14.9656	0.36972	339.178	89.2409	3.70976	17.9571	4.86667	4084.33	28.5903
56	2018-06-04	SM	3	55.64	13256.5	13.2565	0.36166	230.478	54.9123	2.52085	17.9571	4.86667	4084.33	28.5903
57	2018-06-04	PM	1	56.35	14306.5	14.3065	0.366275	364.127	92.4469	3.98263	17.9571	4.86667	4084.33	28.5903
58	2018-06-04	PM	2	57.61	13702.2	13.7022	0.374465	382.456	90.965	4.18311	17.9571	4.86667	4084.33	28.5903
59	2018-06-04	PM	3	51.18	9500.7	9.5007	0.33267	377.971	70.1638	4.13405	17.9571	4.86667	4084.33	28.5903
60	2018-06-11	PP	1	44.93	11562.7	11.5627	0.292045	277.313	71.3661	3.03311	17.2714	7.64762	5356.94	37.4986
61	2018-06-11	PP	2	41.79	10064	10.064	0.271635	253.328	61.0073	2.77078	17.2714	7.64762	5356.94	37.4986
62	2018-06-11	PP	3	40.09	8742.81	8.74281	0.260585	267.264	58.2847	2.9232	17.2714	7.64762	5356.94	37.4986
63	2018-06-11	SM	1	57.57	16634.6	16.6346	0.374205	378.505	109.367	4.1399	17.2714	7.64762	5356.94	37.4986
64	2018-06-11	SM	2	55.8	14788.8	14.7888	0.3627	335.601	88.945	3.67064	17.2714	7.64762	5356.94	37.4986
65	2018-06-11	SM	3	55.81	14322.4	14.3224	0.362765	315.642	81.0025	3.45234	17.2714	7.64762	5356.94	37.4986
66	2018-06-11	PM	1	55.69	13584.4	13.5844	0.361985	435.364	106.198	4.7618	17.2714	7.64762	5356.94	37.4986
67	2018-06-11	PM	2	56.49	13618.4	13.6184	0.367185	485.902	117.14	5.31455	17.2714	7.64762	5356.94	37.4986
68	2018-06-11	PM	3	51.63	9831.46	9.83146	0.335595	415.048	79.0341	4.53959	17.2714	7.64762	5356.94	37.4986
69	2018-06-18	PP	1	47.5	11409.3	11.4093	0.30875	294.68	70.781	3.22306	16	5.83333	4569.21	31.9845
70	2018-06-18	PP	2	43.61	9467.48	9.46748	0.283465	259.508	56.3378	2.83837	16	5.83333	4569.21	31.9845
71	2018-06-18	PP	3	38.4	7879.89	7.87989	0.2496	234.284	48.0764	2.56248	16	5.83333	4569.21	31.9845
72	2018-06-18	SM	1	58.41	15983.2	15.9832	0.379665	377	103.161	4.12344	16	5.83333	4569.21	31.9845
73	2018-06-18	SM	2	57.72	15237	15.237	0.37518	348.984	92.1251	3.81701	16	5.83333	4569.21	31.9845
74	2018-06-18	SM	3	57.96	14271.5	14.2715	0.37674	354.405	87.2651	3.8763	16	5.83333	4569.21	31.9845
75	2018-06-18	PM	1	50.04	10710	10.71	0.32526	398.143	85.2144	4.35469	16	5.83333	4569.21	31.9845
76	2018-06-18	PM	2	50.32	12056.7	12.0567	0.32708	423.327	101.43	4.63014	16	5.83333	4569.21	31.9845
77	2018-06-18	PM	3	47.64	6996.16	6.99616	0.30966	452.732	66.4858	4.95175	16	5.83333	4569.21	31.9845
78	2018-06-25	PP	1	44.78	10955.9	10.9559	0.29107	301.104	73.6682	3.29332	16.2286	9.66905	6324.03	44.2682
79	2018-06-25	PP	2	40.52	9390.41	9.39041	0.26338	274.922	63.7125	3.00696	16.2286	9.66905	6324.03	44.2682
80	2018-06-25	PP	3	36.09	10793.6	10.7936	0.234585	186.245	55.701	2.03705	16.2286	9.66905	6324.03	44.2682
81	2018-06-25	SM	1	57.17	17075.6	17.0756	0.371605	386.29	115.378	4.22505	16.2286	9.66905	6324.03	44.2682
82	2018-06-25	SM	2	57.31	15959	15.959	0.372515	354.437	98.6995	3.87666	16.2286	9.66905	6324.03	44.2682
83	2018-06-25	SM	3	57.59	15184.1	15.1841	0.374335	355.811	93.8125	3.89168	16.2286	9.66905	6324.03	44.2682
84	2018-06-25	PM	1	46.36	10003.9	10.0039	0.30134	318.894	68.8132	3.4879	16.2286	9.66905	6324.03	44.2682
85	2018-06-25	PM	2	47.36	9972.46	9.97246	0.30784	382.03	80.443	4.17845	16.2286	9.66905	6324.03	44.2682
86	2018-06-25	PM	3	41.75	5370.66	5.37066	0.271375	333.58	42.9113	3.64854	16.2286	9.66905	6324.03	44.2682
87	2018-07-30	PP	1	51.42	12456.1	12.4561	0.321375	352.391	85.3638	3.85428	23.9	9.47857	5358.47	37.5093
88	2018-07-30	PP	2	48.76	11641	11.641	0.30475	322.772	77.059	3.53032	23.9	9.47857	5358.47	37.5093
89	2018-07-30	PP	3	43.87	9234.67	9.23467	0.274187	220.226	46.3578	2.40872	23.9	9.47857	5358.47	37.5093
90	2018-07-30	SM	1	55.69	12819.1	12.8191	0.348062	254.897	58.6737	2.78793	23.9	9.47857	5358.47	37.5093
91	2018-07-30	SM	2	55.76	13707.3	13.7073	0.3485	311.392	76.5484	3.40585	23.9	9.47857	5358.47	37.5093
92	2018-07-30	SM	3	55.38	12247.3	12.2473	0.346125	208.852	46.1877	2.28432	23.9	9.47857	5358.47	37.5093
93	2018-07-30	PM	1	58.46	10035.8	10.0358	0.365375	243.422	41.788	2.66242	23.9	9.47857	5358.47	37.5093
94	2018-07-30	PM	2	59.32	8702.76	8.70276	0.37075	529.534	77.6873	5.79178	23.9	9.47857	5358.47	37.5093
95	2018-07-30	PM	3	55.52	10443.9	10.4439	0.347	368.353	69.2914	4.02886	23.9	9.47857	5358.47	37.5093
96	2018-08-06	PP	1	46.32	13751.2	13.7512	0.2895	354.493	105.24	3.87726	21.9571	13.1405	6601.07	46.2075
97	2018-08-06	PP	2	46.28	12840.4	12.8404	0.28925	353.962	98.2065	3.87146	21.9571	13.1405	6601.07	46.2075
98	2018-08-06	PP	3	43.26	10703.2	10.7032	0.270375	303.997	75.2136	3.32497	21.9571	13.1405	6601.07	46.2075
99	2018-08-06	SM	1	48.17	13842	13.842	0.301063	317.489	91.2328	3.47253	21.9571	13.1405	6601.07	46.2075
100	2018-08-06	SM	2	51.1	14161.8	14.1618	0.319375	305.562	84.6832	3.34209	21.9571	13.1405	6601.07	46.2075
101	2018-08-06	SM	3	51.65	11152.1	11.1521	0.322813	220.475	47.6042	2.41145	21.9571	13.1405	6601.07	46.2075
102	2018-08-06	PM	1	53.17	10427.9	10.4279	0.332313	DO	DO	DO	21.9571	13.1405	6601.07	46.2075
103	2018-08-06	PM	2	56.46	11369.2	11.3692	0.352875	298.906	60.1898	3.26929	21.9571	13.1405	6601.07	46.2075
104	2018-08-06	PM	3	48.98	11110.6	11.1106	0.306125	412.781	93.6353	4.51479	21.9571	13.1405	6601.07	46.2075
105	2018-08-13	PP	1	47.29	12696	12.696	0.295563	223.348	59.9623	2.44287	19.1	6.71429	4209.01	29.4631
106	2018-08-13	PP	2	43.94	11667	11.667	0.274625	235.697	62.5826	2.57794	19.1	6.71429	4209.01	29.4631
107	2018-08-13	PP	3	43.99	10467	10.467	0.274938	230.031	54.7337	2.51597	19.1	6.71429	4209.01	29.4631
108	2018-08-13	SM	1	49.25	11674.6	11.6746	0.307812	206.225	48.8849	2.25558	19.1	6.71429	4209.01	29.4631
109	2018-08-13	SM	2	50.26	11444.8	11.4448	0.314125	203.966	46.4454	2.23087	19.1	6.71429	4209.01	29.4631
110	2018-08-13	SM	3	52.56	9238.74	9.23874	0.3285	153.193	26.9275	1.67555	19.1	6.71429	4209.01	29.4631
111	2018-08-13	PM	1	50.51	8804.12	8.80412	0.315688	DO	DO	DO	19.1	6.71429	4209.01	29.4631
112	2018-08-13	PM	2	51	9518.25	9.51825	0.31875	167.818	31.3203	1.83551	19.1	6.71429	4209.01	29.4631
113	2018-08-13	PM	3	46.55	9988.51	9.98851	0.290937	316.657	67.947	3.46344	19.1	6.71429	4209.01	29.4631
114	2018-08-27	PP	1		14202	14.202			48.129		16.2167	4.61429	3445.63	24.1194
115	2018-08-27	PP	2		12471.6	12.4716			43.5989		16.2167	4.61429	3445.63	24.1194
116	2018-08-27	PP	3		9353.63	9.35363			37.647		16.2167	4.61429	3445.63	24.1194
117	2018-08-27	SM	1		9007.29	9.00729			24.0117		16.2167	4.61429	3445.63	24.1194
118	2018-08-27	SM	2		11440.3	11.4403			45.1669		16.2167	4.61429	3445.63	24.1194
119	2018-08-27	SM	3		8982.22	8.98222			28.2741		16.2167	4.61429	3445.63	24.1194
120	2018-09-24	PP	1	55.02	13733.5	13.7335	0.343875	188.06	46.9414	1.17538	15.1	5.93571	2997.5	20.9825
121	2018-09-24	PP	2	54.65	13655.3	13.6553	0.341562	209.738	52.407	1.31086	15.1	5.93571	2997.5	20.9825
122	2018-09-24	PP	3	52.28	11148.4	11.1484	0.32675	202.068	43.0897	1.26293	15.1	5.93571	2997.5	20.9825
123	2018-09-24	SM	1	60.77	15415	15.415	0.379813	224.738	57.0073	1.40461	15.1	5.93571	2997.5	20.9825
124	2018-09-24	SM	2	58.09	15294.2	15.2942	0.363063	109.09	28.7218	0.681814	15.1	5.93571	2997.5	20.9825
125	2018-09-24	SM	3	57.76	14281.2	14.2812	0.361	135.015	33.3826	0.843846	15.1	5.93571	2997.5	20.9825
126	2018-09-24	PM	1	44.82	10899.2	10.8992	0.280125	140.012	34.0476	0.875073	15.1	5.93571	2997.5	20.9825
127	2018-09-24	PM	2	46.23	11403.6	11.4036	0.288938	114.584	28.2646	0.716149	15.1	5.93571	2997.5	20.9825
128	2018-09-24	PM	3	43.11	10309.5	10.3095	0.269437	108.672	25.9883	0.679203	15.1	5.93571	2997.5	20.9825

## Sheet: figureA
productivity per date, per cubicontainer and per growing medium															N content per date, cubicontainer, medium																		P content per date, cubicontainer, growing medium
PM	B.1	B.2	B.3	KWH	SM	B.1	B.2	B.3	PP	B.1	B.2	B.3	Solar irradiance	Temperature	PP	B.1	B.2	B.3	Solar irradiance	Temperature	PM	B.1	B.2	B.3	Solar irradiance	Temperature	SM	B.1	B.2	B.3	Solar irradiance	Temperature	PP	B.1	B.2	B.3	Solar irradiance	Temperature	PM	B.1	B.2	B.3	Solar irradiance	Temperature	SM	B.1	B.2	B.3	Solar irradiance
30/apr	7.83769	7.52079	7.31855	21.9615	30/apr	2.54672	2.16407	3.21226	30/apr	5.0782	3.81271	4.22674	21.9615	10.9	30/apr				21.9615	10.9	30/apr				21.9615	10.9	30/apr				21.9615	10.9	30/apr				21.9615	10.9	30/apr				21.9615	10.9	30/apr				21.9615
7/mei	3.48639	3.97138		41.5817	7/mei	5.5689	4.36553	3.76933	7/mei	5.60902	5.36979	4.83099	41.5817	13.4	7/mei				41.5817	13.4	7/mei				41.5817	13.4	7/mei				41.5817	13.4	7/mei				41.5817	13.4	7/mei				41.5817	13.4	7/mei				41.5817
14/mei	5.5046	4.26479	8.54883	31.7042	14/mei	4.97931	4.12398	4.46122	14/mei	5.51621	5.55888	5.36348	31.7042	14.2857	14/mei	59.5	56.02	51.75	31.7042	14.2857	14/mei	57.58	53.15	34.06	31.7042	14.2857	14/mei	59.81	56.61	54.78	31.7042	14.2857	14/mei	16.0641	14.1894	12.002	31.7042	14.2857	14/mei	8.9064	8.85827	3.21683	31.7042	14.2857	14/mei	16.605	15.3335	14.5171	31.7042
22/mei	5.66603	5.09654	3.58442	36.7334	22/mei	5.24488	5.11034	4.53208	22/mei	6.79766	5.57005	5.49415	36.7334	12.7429	22/mei	49.65	48.82	48.17	36.7334	12.7429	22/mei	56.62	54.08	42.44	36.7334	12.7429	22/mei	53.07	53.09	52.52	36.7334	12.7429	22/mei				36.7334	12.7429	22/mei				36.7334	12.7429	22/mei				36.7334
28/mei	5.43872	7.00033	6.11252	38.1819	28/mei	6.93371	5.35936	7.25609	28/mei	7.26974	6.94011	7.49741	38.1819	19.6429	28/mei	47.16	47.14	42.23	38.1819	19.6429	28/mei	62.74	59.68	52.11	38.1819	19.6429	28/mei	54.49	54.58	51.9	38.1819	19.6429	28/mei	12.4187	11.4798	10.3196	38.1819	19.6429	28/mei	15.1087	14.3588	10.2518	38.1819	19.6429	28/mei	14.8935	13.1306	12.5845	38.1819
4/jun	6.46187	6.63871	7.38512	28.5903	4/jun	5.17739	5.96305	4.1423	4/jun	5.04421	5.38734	5.33225	28.5903	17.9571	4/jun	46.19	46.6	44.71	28.5903	17.9571	4/jun	56.35	57.61	51.18	28.5903	17.9571	4/jun	57.27	56.88	55.64	28.5903	17.9571	4/jun	11.3523	11.2874	10.8803	28.5903	17.9571	4/jun	14.3065	13.7022	9.5007	28.5903	17.9571	4/jun	16.0628	14.9656	13.2565	28.5903
11/jun	7.81764	8.60156	8.03889	37.4986	11/jun	6.57469	6.01436	5.65565	11/jun	6.17211	6.06193	6.66659	37.4986	17.2714	11/jun	44.93	41.79	40.09	37.4986	17.2714	11/jun	55.69	56.49	51.63	37.4986	17.2714	11/jun	57.57	55.8	55.81	37.4986	17.2714	11/jun	11.5627	10.064	8.74281	37.4986	17.2714	11/jun	13.5844	13.6184	9.83146	37.4986	17.2714	11/jun	16.6346	14.7888	14.3224	37.4986
18/jun	7.95649	8.4127	9.50319	31.9845	18/jun	6.45438	6.04615	6.11464	18/jun	6.20378	5.95066	6.10115	31.9845	16	18/jun	47.5	43.61	38.4	31.9845	16	18/jun	50.04	50.32	47.64	31.9845	16	18/jun	58.41	57.72	57.96	31.9845	16	18/jun	11.4093	9.46748	7.87989	31.9845	16	18/jun	10.71	12.0567	6.99616	31.9845	16	18/jun	15.9832	15.237	14.2715	31.9845
25/jun	6.87864	8.06651	7.98995	44.2682	25/jun	6.75687	6.18456	6.17834	25/jun	6.72407	6.78484	5.16057	44.2682	16.2286	25/jun	44.78	40.52	36.09	44.2682	16.2286	25/jun	46.36	47.36	41.75	44.2682	16.2286	25/jun	57.17	57.31	57.59	44.2682	16.2286	25/jun	10.9559	9.39041	10.7936	44.2682	16.2286	25/jun	10.0039	9.97246	5.37066	44.2682	16.2286	25/jun	17.0756	15.959	15.1841	44.2682
2/jul	6.95662	9.80238	5.07211	55.59	2/jul	7.56568	6.52321	6.32372	2/jul	7.63864	7.1277	6.72585	55.59	21.1286	2/jul				55.59	21.1286	2/jul				55.59	21.1286	2/jul				55.59	21.1286	2/jul				55.59	21.1286	2/jul				55.59	21.1286	2/jul				55.59
9/jul	9.62618	9.80476	9.6494	48.5433	9/jul	7.29683	8.06408	6.58803	9/jul	7.87869	7.49764	7.22624	48.5433	21.1714	9/jul				48.5433	21.1714	9/jul				48.5433	21.1714	9/jul				48.5433	21.1714	9/jul				48.5433	21.1714	9/jul				48.5433	21.1714	9/jul				48.5433
16/jul	8.09764	7.40015	6.4568	38.3397	16/jul	4.80184	6.33466	4.75317	16/jul	5.92702	6.63083	4.89415	38.3397	19.6571	16/jul				38.3397	19.6571	16/jul				38.3397	19.6571	16/jul				38.3397	19.6571	16/jul				38.3397	19.6571	16/jul				38.3397	19.6571	16/jul				38.3397
23/jul	6.08748	8.61668	6.18092	41.2953	23/jul	6.43551	7.44871	4.51083	23/jul	7.73332	7.7217	7.95113	41.2953	20.5857	23/jul				41.2953	20.5857	23/jul				41.2953	20.5857	23/jul				41.2953	20.5857	23/jul				41.2953	20.5857	23/jul				41.2953	20.5857	23/jul				41.2953
30/jul	4.1639	8.92674	6.6346	37.5093	30/jul	4.57706	5.5845	3.77125	30/jul	6.85319	6.6196	5.01997	37.5093	23.9	30/jul	51.42	48.76	43.87	37.5093	23.9	30/jul	58.46	59.32	55.52	37.5093	23.9	30/jul	55.69	55.76	55.38	37.5093	23.9	30/jul	12.4561	11.641	9.23467	37.5093	23.9	30/jul	10.0358	8.70276	10.4439	37.5093	23.9	30/jul	12.8191	13.7073	12.2473	37.5093
6/aug	1.71801	5.29412	8.42755	46.2075	6/aug	6.591	5.97969	4.26864	6/aug	7.65312	7.64827	7.02721	46.2075	21.9571	6/aug	46.32	46.28	43.26	46.2075	21.9571	6/aug	53.17	56.46	48.98	46.2075	21.9571	6/aug	48.17	51.1	51.65	46.2075	21.9571	6/aug	13.7512	12.8404	10.7032	46.2075	21.9571	6/aug	10.4279	11.3692	11.1106	46.2075	21.9571	6/aug	13.842	14.1618	11.1521	46.2075
13/aug	1.737	3.29055	6.80252	29.4631	13/aug	4.1873	4.05821	2.91463	13/aug	4.72294	5.36407	5.22917	29.4631	19.1	13/aug	47.29	43.94	43.99	29.4631	19.1	13/aug	50.51	51	46.55	29.4631	19.1	13/aug	49.25	50.26	52.56	29.4631	19.1	13/aug	12.696	11.667	10.467	29.4631	19.1	13/aug	8.80412	9.51825	9.98851	29.4631	19.1	13/aug	11.6746	11.4448	9.23874	29.4631
20/aug	2.4817	-0.0898821	0.271342	26.3092	20/aug	3.68933	3.31841	3.08877	20/aug	4.87712	4.72135	4.8046	26.3092	18.5143	20/aug				26.3092	18.5143	20/aug				26.3092	18.5143	20/aug				26.3092	18.5143	20/aug				26.3092	18.5143	20/aug				26.3092	18.5143	20/aug				26.3092
27/aug	0	0	0	24.1194	27/aug	2.6658	3.94805	3.14778	27/aug	3.3889	3.49585	4.02486	24.1194	16.2167	27/aug				24.1194	16.2167	27/aug				24.1194	16.2167	27/aug				24.1194	16.2167	27/aug	14.202	12.4716	9.35363	24.1194	16.2167	27/aug				24.1194	16.2167	27/aug	9.00729	11.4403	8.98222	24.1194
3/sep	0	0	0	25.5482	3/sep	4.50715	2.80548	2.8014	3/sep	4.40761	3.36848	2.88854	25.5482	15.8429	3/sep				25.5482	15.8429	3/sep				25.5482	15.8429	3/sep				25.5482	15.8429	3/sep				25.5482	15.8429	3/sep				25.5482	15.8429	3/sep				25.5482
10/sep	4.22465	6.7436	6.71177	24.3435	10/sep	5.45067	5.81709	5.87544	10/sep	4.66522	5.12434	1.36624	24.3435	17.1429	10/sep				24.3435	17.1429	10/sep				24.3435	17.1429	10/sep				24.3435	17.1429	10/sep				24.3435	17.1429	10/sep				24.3435	17.1429	10/sep				24.3435
17/sep	-0.0900268	3.8488	3.20244	24.157	17/sep	4.35826	3.58252	5.52167	17/sep	3.56418	2.43337	4.03491	24.157	15.2429	17/sep				24.157	15.2429	17/sep				24.157	15.2429	17/sep				24.157	15.2429	17/sep				24.157	15.2429	17/sep				24.157	15.2429	17/sep				24.157
24/sep	3.12387	2.47856	2.52082	20.9825	24/sep	3.69817	1.87795	2.33752	24/sep	3.41803	3.83785	3.86511	20.9825	15.1	24/sep	55.02	54.65	52.28	20.9825	15.1	24/sep	44.82	46.23	43.11	20.9825	15.1	24/sep	60.77	58.09	57.76	20.9825	15.1	24/sep	13.7335	13.6553	11.1484	20.9825	15.1	24/sep	10.8992	11.4036	10.3095	20.9825	15.1	24/sep	15.415	15.2942	14.2812	20.9825
1/okt	4.02998	4.93146	4.68477	25.208	1/okt	1.64984	3.27698	2.3137	1/okt	3.4586	4.16347	3.17498	25.208	10.7714	1/okt				25.208	10.7714	1/okt				25.208	10.7714	1/okt				25.208	10.7714	1/okt				25.208	10.7714	1/okt				25.208	10.7714	1/okt				25.208
8/okt	2.99897	3.3345	2.84218	20.4994	8/okt	1.68422	1.48289	0.874863	8/okt	2.62757	2.07817	1.9012	20.4994	12.9857	8/okt				20.4994	12.9857	8/okt				20.4994	12.9857	8/okt				20.4994	12.9857	8/okt				20.4994	12.9857	8/okt				20.4994	12.9857	8/okt				20.4994
15/okt	5.42468	5.18823	5.45192	20.4812	15/okt	3.37113	3.61266	2.5603	15/okt	2.75714	1.82425	1.93754	20.4812	17.1286	15/okt				20.4812	17.1286	15/okt				20.4812	17.1286	15/okt				20.4812	17.1286	15/okt				20.4812	17.1286	15/okt				20.4812	17.1286	15/okt				20.4812
						4.8
						24
						7
						806.4	1.24008	1.68056	16.3333
[truncated: 37 more columns]

## Sheet: sumarizing table
Parameter	PP	PM	SM	Unit
Biomass productivity	5.2 ± 1.7 ab	6.1 ± 2.5 b	4.7 ± 1.7 a	g Dry weight (DW) m−2 d−1
Dry weight	9.4 ± 3.1 ab	10.3 ± 4.5 b	8.4 ± 3 a	g/100 g Fresh weight (FW)
Annual biomass production	9.1 ± 3 ab	10.7 ± 4.4 b	8.1 ± 2.9 b	t ha−1 yr−1
Protein content	0.29 ± 0.03 a	0.32 ± 0.04 b	0.35 ± 0.02 b	g g−1 DW
Annual protein production	2.9 ± 0.7 a	3.5 ± 1.3 b	3.0 ± 0.9 ab	t ha−1 yr−1
N content	47 ± 5 a	51 ± 6 b	55 ± 3 b	mg N g−1 DW
N uptake	274 ± 50 a	327 ± 107 b	283 ± 75 ab	mg N m−2 d−1
Annual N uptake	48 ± 9 a	57 ± 20 b	49 ± 13 ab	g N m−2 yr−1
P content	11 ± 2 a	10 ± 3 a	13 ± 3 b	mg P g−1 DW
P uptake	65 ± 18 a	67 ± 26 a	70 ± 26 a	mg P m−2 d−1
Annual P uptake	11 ± 3 a	12 ± 5 a	12 ± 5 a	g P m−2 yr−1
N loading rate	2.1 ± 0.9 a	2.6 ± 1.2 a	4.5 ± 1.2 b	g N m−2 d−1
P loading rate	1.3 ± 2.1 a	0.82 ± 0.76 a	0.15 ± 0.06 b	g P m−2 d−1

## Sheet: composition water
Date	Medium	Cubitainer	Subtype	pH	EC	NO3	NO3_N	NO2	NO2_N	NH4	NH4_N	T-DIN	H2CO3	Cl	SO42-	Ca	Mg	Na	K	T-P	B	Fe	Mn	Cu	Zn
					µS/cm	mg/l	mg/l	mg/l	mg/l	mg/l	mg/l	mg/l	mg/l	mg/l	mg/l	mg/l	mg/l	mg/l	mg/l	mg/l	mg/l	mg/l	mg/l	mg/l	mg/l
2018-04-23	BE	A	recipe1	8.427	7431.5	275.451	62.1986	63.9909	19.4755	54.3749	42.2916	123.966	571.936	966.698	1276	71.582	75.0859	626.42	1451.52	4.77426	1.9646	20.9135	0.882242	0.29826	0.452989
2018-04-30	BE	A	recipe1	8.001	7396	267.176	60.33	52.9207	16.1063	30.9317	24.058	100.494	620.004	1020.24	1396.4	83.8638	78.2963	573.52	1435.8	14.3636	1.98363	41.5004	1.46466	0.686839	1.45298
2018-05-07	BE	A	recipe1	7.772	7105.4	234.086	52.8582	34.9346	10.6323	41.8855	32.5776	96.0681	568.764	978.052	1389.57	101.488	74.5027	548.606	1134.26	21.3493	1.79094	31.1458	1.63497	1.08063	2.12136
2018-05-14	BE	A	recipe1	8.241	6852	168.166	37.973	26.1681	7.9642	33.8975	26.3647	72.3019	663.436	790.817	1109.71	75.3288	70.8649	549.232	1254.96	8.01469	1.68463	8.17364	0.500976	0.194659	0.326254
2018-05-22	BE	A	recipe1	8.004	7148.6	331.508	74.8567	20.4727	6.23083	16.3847	12.7437	93.8312	674.66	949.449	1231.77	87.976	74.0043	558.434	1038.72	16.3672	1.81342	23.1926	1.24613	0.733816	1.18514
2018-05-28	BE	A	recipe1	8.156	7239.4	305.211	68.9186	18.505	5.63196	14.1968	11.042	85.5925	756.156	934.923	1251.52	77.2406	77.0689	583.958	1479.2	13.2275	1.84577	30.6624	0.81743	0.57172	0.773471
2018-06-04	BE	A	recipe1	8.465	6964.3	289.069	65.2736	20.7233	6.30709	6.08141	4.72998	76.3107	662.46	806.51	1177	73.939	73.0616	577.874	1331.08	11.4625	1.77646	13.6575	0.510213	0.505947	0.751587
2018-06-11	BE	A	recipe1	8.678	6913.8	280.054	63.238	14.0093	4.2637	0.860402	0.669202	68.1709	629.764		1185.26	69.1615	71.5157	561.682	1354.2	9.72995	1.82624	10.0459	0.417166	0.450739	0.523003
2018-06-18	BE	A	recipe1	8.453	6962.1	155.208	35.0469	22.4556	6.83431	3.20671	2.4941	44.3753	786.656	1011.23	1311.55	72.0015	73.8073	549.555	1366.96	12.1694	1.80953	9.16024	0.762106	0.394101	0.515786
2018-06-25	BE	A	recipe1	8.539	7341.3	347.423	78.4503	9.66792	2.94241	0.806441	0.627232	82.02	683.932	976.942	1269.65	65.602	79.062	599.37	1073.48	23.454	1.8	6.28271	0.998	0.34	0.566
2018-07-02	BE	A	recipe1	9.019	7461.9	323.313	73.0061	9.49387	2.88944	0.349518	0.271847	76.1674	639.524	1004.26	1324.6	51.0896	75.5001	631.6	1434.71	9.84211	1.78562	4.56301	0.371282	0.293238	0.300294
2018-07-09	BE	A	recipe1	9.035	7472.4	229.803	51.891	11.0012	3.34819	1.10483	0.859315	56.0985	703.696	958.373	1241.74	52.9034	75.8416	619.835	1450.6	11.7128	1.77796	4.57247	0.378026	0.300332	0.371667
2018-07-16	BE	A	recipe1	8.496	10884.5	113.09	25.5363	4.9223	1.49809	118.494	92.1622	119.197	1686.04	1350.19	1771.04	302.492	154.743	970.36	2457.3		3.28098
2018-07-23	BE	A	recipe1	8.455	9757.1	23.2883	5.25864	9.62884	2.93052	87.0608	67.7139	75.9031	1541.1	1433.93	1464.87	80.4846	97.567	860.78	1887.64	26.5667	2.318	20.0856	0.986525	0.696562	1.33745
2018-07-30	BE	A	water	8.13	4184.5	1.65529	0.373775	0.501458	0.152618	11.647	9.05881	9.5852	814.96	621.354	600.765	282.849	82.3888	344.795	1041.3	93.9687	1.52038
2018-08-20	BE	A	water	8.19	4538.9	28.7954	6.50219	179.894	54.7504	0.5293	0.411678	61.2861	1037	495.27	434.23	82.7544	53.4282	380.499	945.92	34.7741	1.09357	22.965	0.822072	0.795703	1.95355
2018-09-10	BE	A	recipe2	8.5319	5252.3	66.7427	15.0709	22.2487	6.77134	8.60273	6.69101	28.5333	1383.24	536.46	496.4	69.3315	61.0778	471.052	1225	45.2718	1.28	37.0488	0.602299	0.876585	2.576
2018-09-17	BE	A	recipe2	8.5935	5279.1	65.935	14.8885	4.233	1.2883	6.92661	5.38737	21.5642	1401.05	517.88	478.92	63.955	59.0814	450.971	1082.12	42.2422	1.20646	38.2129	0.522438	0.823591	2.2785
2018-10-01	BE	A	recipe2	8.23	3183.6	110.379	24.9243	0.202291	0.0615668	0.65422	0.508838	25.4947	724.68	364.37	319.19	61.6107	38.3381	277.451	545.42	15.6065	0.675918	17.3501	0.256318	0.327755	0.846302
2018-10-08	BE	A	recipe2	8.18	5314.7	464.938	104.986	3.63138	1.1052	3.52261	2.73981	108.831	1183.4	421.26	515.68	90.7557	63.1788	467.279	1160.2	44.193	1.37	55.7609	0.932222	1.17897	3.08882
2018-04-23	PP	A	10-50g	7.78	2552	0.062405	0.0140915	0.00197	0.000599565	21.3008	16.5673	16.582	459.94	543.422	96.7638	150.454	15.2828	343.984	11.0891	3.2084	0.071167	0.069359	0.016491	0.011181	0.026781
2018-04-30	PP	A	10-50g	7.93	2127.5	0.381956	0.0862481	0.206888	0.0629659	16.2969	12.6754	12.8246	437.736	416.651	98.5705	145.407	15.9795	265.453	11.2216	3.44727	0.020544	0.08759	0.031089	-0.01492	-0.013773
2018-05-07	PP	A	10-50g	8.138	2372.6	4.92515	1.11213	2.09121	0.636456	28.3008	22.0117	23.7603	463.356	485.241	114	142.8	14.994	300.856	12.338	4.712	0.044	0.159008	0.016	0.006	0.032
2018-05-14	PP	A	10-50g	7.864	2232.6	5.52398	1.24735	1.35791	0.413277	19.3922	15.0828	16.7434	430.416	424.416	69.3736	143.095	16.3669	298.123	11.3889	3.54111	0.025189	0.080514	0.016858	0.002901	0.014
2018-05-22	PP	A	>50g	7.925	1176.9	78.0098	17.6151	2.70137	0.822156	8.47459	6.59135	25.0286	285.968	134.267	99	140.102	15.3091	84.7898	7.24362	1.8558	0.035172	0.019668	0.013706	0.007238	0.013132
2018-05-28	PP	A	>50g	7.807	1228.7	63.0166	14.2295	2.92895	0.891418	1.25808	0.978511	16.0995	286.456	149.755	104.482	138.962	15.3962	99.405	6.80666	2.02715	0.013473	0.034346	0.016194	0.000236	0.098666
2018-06-04	PP	A	>50g	7.732	1086.9	62.5182	14.117	2.78642	0.848042	2.84869	2.21565	17.1807	315.248	98.7185	109.415	144.452	16.6677	63.8667	9.23425	2.52317	-0.019699	0.033823	0.02078	0.0025	0.01803
2018-06-11	PP	A	>50g	7.736	1070.3	40.7463	9.20077	1.55823	0.474244	1.50792	1.17283	10.8478	286.7	116.684	106.903	132.178	15.7018	73.1072	8.25106	4.03228	0.052095	0.23934	0.040552	0.012785	0.199818
2018-06-18	PP	A	>50g	7.686	1144.1	41.9722	9.4776	2.98839	0.909508	3.57541	2.78088	13.168	330.62	116.356	105.73	131.338	16.5782	74.0579	8.12434	2.98764	0.052355	0.095029	0.018007	0.002302	0.064061
2018-06-25	PP	A	>50g	7.609	1093.7	102.796	23.2119	3.04947	0.928099	1.82782	1.42164	25.5617	279.868	88.066	122.72	132.478	17.0621	57.8638	10.4547	2.79824	0.15848	0.031026	0.031359	-0.017717	-0.000638
2018-07-02	PP	A	>50g	7.643	1014.4	43.5633	9.83689	1.6354	0.497731	1.48436	1.1545	11.4891	281.82	91.475	113.892	200.768	19.2616	63.9682	11.3262	9.60569	0.047224	0.468248	0.05878	0.01749	0.292203
2018-07-09	PP	A	>50g	7.712	975.9	74.1676	16.7475	2.87279	0.874328	2.63014	2.04567	19.6675	283.772	62.269	111.273	139.138	17.9399	44.71	9.43146	4.9297	0.078428	0.288134	0.030994	0.013526	0.166552
2018-07-16	PP	A	>50g	7.729	914.6	31.2159	7.04876	1.32343	0.402782	1.33265	1.03651	8.48805	252.784	67.5536	115.511	174.402	19.1878	50.4572	10.0214	15.7954	0.166	1.43979	0.096305	0.063472	0.880008
2018-07-23	PP	A	sediment	7.478	1065	164.861	37.2266	3.01137	0.916505	4.80233	3.73515	41.8783	240.584	58.538	115.976	472.84	22.701	41.4421	15.7458	52.534	0.256	8.06991	0.638577	0.246595	3.34424
2018-07-30	PP	A	>50g	8.06	953.6	91.5823	20.6799	1.6712	0.508625	1.97051	1.53262	22.7211	270.84	55.305	115.23	137.885	17.4005	36.3092	10.0744	2.95851	0	0.177599	0.023745	0.004951	0.080246
2018-08-06	PP	A	>50g	7.7886	859.8	108.508	24.5018	0.932311	0.283747	0.188539	0.146641	24.9322	148.352	59.405	116.885	118.195	18.0722	37.7964	10.9186	2.56805	0.097315	0.060037	0.016143	0.001457	0.010744
2018-08-20	PP	A	>50g	7.55	974.5	75.468	17.0412	0.773039	0.235273	0.537799	0.418288	17.2868	279.38	61.419	116.493	144.351	19.3214	44.5013	9.85021	4.67614	0.050876	0.117977	0.028614	0.005641	0.07151
2018-08-27	PP	A	sediment	7.71	1012.6	82.2356	18.5693	3.04323	0.9262	6.86351	5.33829	24.8338	234.24	84.864	130.853	329.391	25.5146	66.4018	11.8103	69.693	0.192	6.6462	0.371022	0.299222	4.19562
2018-09-03	PP	A	>50g	7.63	1042.3	29.7917	6.72715	2.09745	0.638355	6.79204	5.28269	12.6482	300.12	86.824	132.21	121.348	19.8006	65.2585	10.0135	4.95248	0.03194	0.196678	0.02287	0.007048	0.105889
2018-09-10	PP	A	>50g	7.63	1005.2	19.3085	4.35998	0.139896	0.042577	4.8277	3.75488	8.15743	312.32	81.764	127.738	114.47	19.0396	59.0828	8.04777	3.06868	0.04	0.054168	0.009353	-0.001037	0.014
2018-09-17	PP	A	sediment	7.68	1089.1	110.648	24.9851	2.50203	0.761489	3.99602	3.10801	28.8546	269.62	90.7	146.44	277.09	24.4373	70.9898	11.9669	54.1488	0.214795	5.82084	0.273716	0.220374	3.21513
2018-10-01	PP	A	>50g	7.62	1052.7	62.6302	14.1423	3.99064	1.21454	1.81804	1.41403	16.7709	292.8	81.602	123.102	115.605	20.3166	69.8165	13.5204	4.72954		0.160374	0.089969	0.007448	0.11345
2018-10-08	PP	A	>50g	7.61	1020.7	54.5387	12.3152	1.70732	0.519619	0.354283	0.275553	13.1104	305	80.566	121.335	117.584	20.2598	70.2064	9.1272	4.14447	0.03584	0.148305	0.027466	0.000722	0.060229
2018-04-16	SM	A		6.915	1437.6	582.304	131.488	0.134642	0.040978	1.49337	1.16151	132.69	45.628	6.1608	94.4189	39.365	22.3594	5.63018	347.32	4.7663	0.15173	0.575003	0.015247	0.019419	0.03989
2018-04-23	SM	A		8.293	1192.1	442.276	99.8688	0.955955	0.290943	0.514876	0.400459	100.56	34.404	4.9654	78.8341	34.538	19.6101	4.434	286.54	3.66556	0.254708	0.51536	0.012101	0.023887	0.029608
2018-04-30	SM	A		7.578	1445.5	519.624	117.335	1.30438	0.396986	1.04482	0.812637	118.544	40.992	4.4773	127.524	50.8408	25.0603	4.60309	160.66	4.66955	0.099778	0.743017	0.105116	-0.002393	0.010013
2018-05-07	SM	A		7.195	990.3	364.694	82.3503	0.427569	0.13013	1.13059	0.879347	83.3598	43.432	3.0296	58.9653	33.5057	11.2659	3.2304	229.02	3.04824	0.105833	0.346918	0.238508	0.007812	0.015984
2018-05-14	SM	A		8.84	1515.9	608.997	137.516	3.95978	1.20515	1.01623	0.790401	139.511	13.664	4.55	80.9779	45.1133	22.2657	4.32861	366.38	2.50107	0.10817	0.37363	0.110244	0.012806	0.014
2018-05-22	SM	A		6.796	2384.5	883.831	199.575	8.78914	2.67495	1.46195	1.13707	203.387	60.756	5.9602	147.521	69.8249	32.4289	6.16647	534.52	7.28937	0.197491	1.03142	0.510392	0.021617	0.050555
2018-05-28	SM	A		7.365	1649.7	608.954	137.506	2.76015	0.62326	0.135351	0.0411938	138.17	103.7	5.2315	114.954	58.4746	26.6147	4.61308	391.24	1.30155	-0.00092	0.355215	0.008768	0.010754	0.020404
2018-06-11	SM	A		7.393	1763.3	661.396	149.347	4.26157	1.297	0.041468	0.0322529	150.677	105.896		117.63	60.6224	28.0812	4.9364	405.74	1.8478	0.052067	0.419584	0.01343	0.01177	0.031129
2018-06-18	SM	A		7.339	1766.6	807.391	182.314	4.40114	1.33948	0.092853	0.072219	183.726	111.264	8.004	116.936	60.3371	27.7297	4.19958	392.26	2.2115	0.072019	0.422613	0.012141	0.009078	0.028279
2018-06-25	SM	A		6.999	1468.1	562.816	127.087	6.04475	1.83971	0.732133	0.569437	129.497	44.896	6.922	82.03	43.928	17.8534	3.51262	321.98	6.23121	0.212159	0.980654	0.619422	-0.001637	0.014701
2018-07-02	SM	A		7.191	892.9	318.223	71.8568	1.67809	0.510724	2.86401	2.22757	74.5951	61.976	6.244	54.252	42.9058	13.6393	2.86413	171.93	4.45672	0.119285	1.14376	0.78888	0.015478	0.050334
2018-07-09	SM	A		7.888	1280.7	451.36	101.92	7.05653	2.14764	0.128655	0.100065	104.168	80.52	5.81	84.281	53.9501	20.9352	4.24495	283.9	4.3916	0.171851	0.732086	0.441099	0.008533	0.020146
2018-07-16	SM	A		7.663	2520.8	722.485	163.142	1.58023	0.48094	0.50174	0.390242	164.013	336.232	42.766	181.145	190.471	31.8764	27.5659	549.72	7.17564	0.184834	2.30729	2.11118	0.039629	0.112955
2018-07-23	SM	A		8.184	2105.7	640.62	144.656	2.05903	0.626661	0.070058	0.0544896	145.337	306.708	37.864	166.372	156.397	37.6339	23.832	349.3	4.15289	0.118	2.03777	1.40675	0.025162	0.077137
2018-07-30	SM	A		8.3053	1700	439.018	99.133	6.54588	1.99222	0.012878	0.0100162	101.135	228.14	30.26	192.065	118.664	43.7282	20.793	280.56	3.02586	0.064	1.80022	1.36724	0.014726	0.060182
2018-08-06	SM	A		7.84	1917.7	473.455	106.909	1.00456	0.305735	0.393691	0.306204	107.521	333.06	50.862	199.32	171.911	39.7523	36.8204	302.08	3.72877	0.063101	0.885476	2.01952	0.034169	0.046843
2018-08-20	SM	A		8.2	2088.6	573.709	129.547	0.8466	0.257661	0.196781	0.153052	129.883	308.66	47.06	206.092	144.665	44.0707	36.4485	407	2.10282	0.087056	0.659488	0.820692	0.034766	0.023536
2018-08-27	SM	A		6.94	1219.3	397.947	89.859	0.108698	0.033082	3.01752	2.34696	92.239	52.46	5.538	81.609	25.1543	20.6717	3.5779	205.059	4.05038	0.124	0.659393	0.626222	0.009352	0.09689
2018-09-03	SM	A		7.23	1632.3	551.663	124.569	2.20976	0.672537	1.0841	0.843187	126.085	100.04	8.222	105.25	83.1297	26.4031	6.11479	380.28	7.25571	0.090142	0.674445	0.689412	0.006399	0.040174
2018-09-10	SM	A		7.47	1802.8	591.234	133.504	0.83839	0.255162	0.056665	0.0440728	133.804	156.16	0.183	139.36	80.7999	30.6351	10.9587	243.201	5.72566	0.098	0.659969	0.275131	0.005608	0.026
2018-09-17	SM	A		7.82	1269.6	477.542	107.832	2.9516	0.898315	1.98352	1.54274	110.273	78.08	14.88	99.2	48.9589	19.0161	4.88292	251.28	4.31868	0.118083	0.586527	0.329496	0.008961	-0.007639
2018-10-01	SM	A		7.04	898.6	323.968	73.154	0.262715	0.0799567	1.83001	1.42334	74.6573	43.92	3.583	55.842	36.5328	13.5716	3.20992	188.52	4.43378	0.149571	0.715905	0.802963	0.01733	0.10714
2018-10-08	SM	A		7.12	1199.9	472.747	106.749	1.32211	0.402383	1.18339	0.920414	108.072	67.1	4.165	72.478	54.7772	18.8519	2.82041	257.98	4.16223	0.104025	0.523372	0.537315	0.00717	0.035204

## Sheet: amino acid content
code	nummer	datum	medium	AspAc	GluAc	Ser	His	Gly	Thr	Arg	Ala	Tyr	Val	Met	Phe	Iso	Leu	Lys	TotPAA	kjN	TotP	difference	essential	non-essential	essentialtyro	recovery	percessent	ratiopig	prAspAc	prGluAc	prSer	prHis	prGly	prThr	prArg	prAla	prTyr	prVal	prMet	prPhe	prIso	prLeu	prLys	EAAI
A1 11/06	staal nr 5	43627	PP	14.5501	10.4811	4.65969	2.31553	4.17609	4.19472	5.61918	6.03205	3.6295	5.07141	2.20239	4.77786	4.04444	8.26078	5.83338	243.158	44.93	280.812	37.6545	36.7005	49.1477	40.33	85.8482	0.427505		0.386412	0.278349	0.123749	0.0614942	0.110905	0.1114	0.14923	0.160195	0.0963897	0.134683	0.0584895	0.126887	0.107409	0.219384	0.154919	1.03883
A1 18/06	staal nr 6	43634	PP	18.0596	11.425	4.93645	2.5393	4.15615	4.44002	6.09008	6.30345	3.82258	5.4501	0.785215	5.00397	4.31752	8.78057	6.19526	276.421	47.5	296.875	20.454	37.512	54.7934	41.3345	92.3053	0.40639		0.882938	0.558571	0.241344	0.124147	0.203195	0.217073	0.297745	0.308177	0.186886	0.266456	0.0383893	0.244645	0.211084	0.429284	0.302887	0.932301
A1 25/06	staal nr 12	43641	PP	15.851	9.32473	4.95321	2.29769	4.00299	4.50325	6.91822	6.30112	4.58102	5.42552	2.73969	5.61312	4.46554	8.83295	6.40112	260.635	44.78	279.875	19.2399	40.2789	51.9323	44.8599	92.2112	0.436811		0.823861	0.484656	0.257445	0.119423	0.208057	0.234058	0.359577	0.327503	0.2381	0.281993	0.142396	0.291744	0.232098	0.459095	0.3327	1.68057
A1 30/07	staal nr 4	43676	PP	15.9192	10.7029	4.79812	2.32236	4.06031	4.40074	6.33408	6.16577	3.6719	5.29989	1.17629	4.96195	4.1106	8.51905	5.99649	286.913	51.42	321.375	34.4618	36.7874	51.6522	40.4593	88.4396	0.41596		0.461938	0.310572	0.13923	0.0673895	0.117821	0.127699	0.1838	0.178916	0.10655	0.15379	0.0341331	0.143984	0.11928	0.247203	0.174004	0.959734
A1 13/08	staal nr 14	43690	PP	16.1439	11.452	4.8994	2.48085	3.8699	4.50576	6.61822	6.35796	3.52493	6.10931	2.12902	5.10165	4.36322	8.87492	6.23315	276.466	47.29	295.562	19.0966	39.7979	52.8663	43.3228	92.6642	0.429485		0.845383	0.599689	0.25656	0.129911	0.202649	0.235947	0.346566	0.332938	0.184585	0.319917	0.111487	0.26715	0.228482	0.464739	0.326402	1.57719
I1 11/06	staal nr 3	43627	PM	16.1464	12.1325	5.16738	2.24023	4.2142	4.5621	7.48927	6.52909	3.70191	5.5576	1.40622	5.16493	4.38098	8.96916	6.34505	330.648	55.69	348.062	17.4144	38.6263	55.3807	42.3282	94.0069	0.410887		0.927185	0.696692	0.29673	0.128642	0.241995	0.261973	0.430062	0.374925	0.212577	0.319138	0.0807506	0.29659	0.251572	0.515043	0.364356	1.03282
I1 18/06	staal nr 13	43634	PM	15.3442	9.90464	4.91806	2.19035	4.19588	4.30895	8.03978	6.26456	3.3858	5.13737	1.89391	5.31117	4.20894	8.23067	5.69571	281.764	50.04	312.75	30.9855	36.9771	52.0529	40.3629	89.03	0.415333		0.495205	0.319654	0.158721	0.0706894	0.135414	0.139063	0.259469	0.202177	0.109271	0.165799	0.0611226	0.171408	0.135836	0.26563	0.183819	1.47175
I1 25/06	staal nr 9	43641	PM	17.4288	12.2658	5.6667	2.50452	5.05477	5.10656	7.23356	7.32462	4.05684	6.17513	2.58376	5.60229	4.78037	9.72466	6.51356	298.379	46.36	289.75	-8.62871	42.9908	59.0311	47.0477	102.022	0.421388		-2.01986	-1.42151	-0.656726	-0.290254	-0.585808	-0.59181	-0.838313	-0.848866	-0.470156	-0.715649	-0.299438	-0.649262	-0.554007	-1.12701	-0.75487	1.20557
I1 30/07	staal nr 1	43676	PM	14.0386	11.9837	4.94587	2.15652	4.02138	4.4998	7.54947	6.42995	3.56681	5.68802	0.843397	5.15857	4.37031	8.78544	6.37702	338.912	59.32	370.75	31.8376	37.8791	52.5358	41.4459	90.4149	0.418947		0.440944	0.376401	0.155347	0.067735	0.126309	0.141336	0.237124	0.201961	0.112031	0.178657	0.0264906	0.162028	0.137269	0.275945	0.200298	1.38909
N3 11/06	staal nr 15	43627	SM	15.2576	10.9207	4.56185	2.22425	3.48189	4.24027	6.73801	5.92391	3.19221	5.23937	1.71187	5.03595	4.14079	8.34354	5.88071	306.2	55.81	348.812	42.6127	36.8167	50.0762	40.009	86.893	0.423702		0.358053	0.256279	0.107054	0.0521968	0.0817101	0.0995072	0.158122	0.139017	0.0749122	0.122953	0.0401727	0.11818	0.0971726	0.195799	0.138004	1.4506
N1 18/06	staal nr 2	43634	SM	17.3552	10.6117	4.67217	2.14882	3.95051	4.32751	6.23667	6.11176	3.51874	5.27256	2.52385	4.95413	4.15992	8.38991	5.94654	332.223	58.41	365.062	32.84	37.7232	52.4568	41.242	90.18	0.418311		0.528478	0.323133	0.142271	0.0654331	0.120296	0.131776	0.189911	0.186107	0.107148	0.160553	0.076853	0.150856	0.126672	0.255478	0.181076	1.0634
N1 25/06	staal nr 11	43641	SM	14.6686	8.40452	4.53655	2.15441	3.60943	4.09522	6.6539	5.71517	3.98758	4.91092	2.57478	5.10023	4.0146	8.02464	5.71877	303.89	57.17	357.312	53.4226	36.5936	47.5758	40.5812	84.1694	0.434761		0.274578	0.157322	0.0849182	0.0403277	0.0675638	0.0766571	0.124552	0.10698	0.0746423	0.091926	0.0481965	0.0954696	0.075148	0.150211	0.107048	1.51632
N1 30/07	staal nr 8	43676	SM	15.3748	10.7609	4.85916	2.00693	4.13064	4.36124	5.63114	6.34762	3.60829	5.2845	2.53113	4.90584	4.20334	8.42326	5.71717	309.394	55.69	348.062	38.669	37.4334	50.7126	41.0417	88.146	0.424675		0.397601	0.278282	0.125661	0.0519004	0.10682	0.112784	0.145624	0.164153	0.0933122	0.13666	0.0654563	0.126868	0.108701	0.21783	0.147849	1.07069
N1 13/08	staal nr 7	43690	SM	15.1793	11.489	5.5314	2.3339	4.66468	4.8618	6.75124	7.02074	3.9514	6.02375	2.54418	5.4916	4.67466	9.65184	6.74672	301.067	49.25	307.812	6.74566	42.3284	54.5878	46.2798	96.9162	0.436753		2.25023	1.70317	0.819994	0.345986	0.691509	0.72073	1.00083	1.04078	0.585769	0.892981	0.377157	0.814093	0.692987	1.43082	1.00016	1.72544
		AA	PP	PM	SM	Overall	CoV
						Average
		Asp	16 ± 1	16 ± 1	16 ± 1	16 ± 1	0.07
		Glu	11 ± 1	12 ± 1	10 ± 1	11 ± 1	0.1
		Ser	4.8 ± 0.1	5.2 ± 0.3	4.8 ± 0.4	4.9 ± 0.3	0.07
		His	2.4 ± 0.1	2.3 ± 0.2	2.2 ± 0.1	2.3 ± 0.2	0.07
		Gly	4.1 ± 0.1	4.4 ± 0.5	4.0 ± 0.5	4.1 ± 0.4	0.09
		Thr	4.4 ± 0.1	4.6 ± 0.3	4.4 ± 0.3	4.5 ± 0.3	0.06
		Arg	6.3 ± 0.5b	7.6 ± 0.3a	6.4 ± 0.5b	6.7 ± 0.7	0.11
		Ala	6.2 ± 0.1	6.6 ± 0.5	6.2 ± 0.5	6.3 ± 0.4	0.07
		Tyr	3.8 ± 0.4	3.7 ± 0.3	3.7 ± 0.3	3.7 ± 0.3	0.09
		Val	5.5 ± 0.4	5.6 ± 0.4	5.3 ± 0.4	5.5 ± 0.4	0.07
		Met	1.8 ± 0.8	1.7 ± 0.7	2.4 ± 0.4	2.0 ± 0.7	0.35
		Phe	5.1 ± 0.3	5.3 ± 0.2	5.1 ± 0.2	5.2 ± 0.3	0.05
		Iso	4.3 ± 0.2	4.4 ± 0.2	4.2 ± 0.3	4.3 ± 0.2	0.05
		Leu	8.7 ± 0.3	8.9 ± 0.6	8.6 ± 0.6	8.7 ± 0.5	0.06
		Lys	6.1 ± 0.2	6.2 ± 0.4	6.0 ± 0.4	6.1 ± 0.3	0.05
		Tryp	ND	ND	ND	ND
		Cys	<LOD	<LOD	<LOD	<LOD
		Hydr	<LOD	<LOD	<LOD	<LOD
		Pro	<LOD	<LOD	<LOD	<LOD
		Sum Amino Acids	269 ± 17	312 ± 27	311 ± 12	296 ± 27	0.09
		Crude protein (Kjeldahl)	295 ± 17	330 ± 36	345 ± 22	323 ± 32	0.1
		EAAI	1.0 ± 0.1	1.1 ± 0.1	1.1 ± 0.1	1.1 ± 0.1	0.08

## Sheet: figures AA
	Arg	Ile	Leu	Lys	Met	Met + Cys	Thr	Val
Duckweed	6.70734	4.30252	8.70081	6.11433	1.97469	1.97469	4.45771	5.47468
Broiler requirements	6.25641	4.15385	6.51282	5.94872	2.41026	4.66667	4	4.61538
	Ile	Leu	Val	Lys	Phe + Tyr	Met + Cys	Thr
Human requirements	4	7	5	5.5	6	3.5	4
duckweed	4.30252	8.70081	5.47468	6.11433	8.88448	1.97469	4.45771

## Sheet: climate
year	month	day	station	GLOBAL	GLOBAL_ESTIMATE	SUNSHINE	SUNSHINE_ESTIMATE	date	Solar radiation (W/m²	Solar period (h)	Solarintensity Photons (µmol/m²/s)	Relative	solar period* (h)	Temperature	Solar radiation (W/m²	Solar period (h)	Solarintensity Photons (µmol/m²/s)		solar period* (h)	Temperature	date	Solar radiation (W/m²	Solar period (h)	Solarintensity Photons (µmol/m²/s)		solar period* (h)	Temp
2018	4	4	Beitem	3448.3	0	297	0	2018-04-04	696.626	4.95	152.435	0.410875	2.03383	10.2							2018-04-30	845.013	6.85556	198.656	0.535461	2.67783	12.7
2018	4	5	Beitem	2836.5	0	200	0	2018-04-05	850.95	3.33333	186.204	0.501896	1.67299	7.2							2018-05-07	526.58	11.7	115.225	0.310581	3.4409	12.3667
2018	4	6	Beitem	5245.2	0	719	0	2018-04-06	437.708	11.9833	95.7785	0.258163	3.09366	10.1							2018-05-14	523.137	11.3583	117.486	0.316673	3.37616	16.0333
2018	4	7	Beitem	4585.1	0	576	0	2018-04-07	477.615	9.6	104.511	0.2817	2.70432	13.9							2018-05-22	707.871	8.99333	157.818	0.425385	3.5	12.6
2018	4	8	Beitem	3443.7	0	310	0	2018-04-08	666.523	5.16667	145.847	0.39312	2.03112	13.2							2018-05-28	844.251	7.46389	188.383	0.507771	3.11625	19.0667
2018	4	9	Beitem	2492.1	0	120	0	2018-04-09	1246.05	2	272.659	0.734929	1.46986	10.4							2018-06-04	862.003	6.12667	204.217	0.55045	2.7034	18.3
2018	4	10	Beitem	4785.8	0	492	0	2018-04-10	583.634	8.2	127.71	0.344231	2.8227	13.6	729.245	6.17222	159.572	0.430114	2.16763	10.8333	2018-06-11	1037.48	6.82222	225.754	0.608501	3.0232	17.0167
2018	4	11	Beitem	3657.7	0	472	0	2018-04-11	464.962	7.86667	101.742	0.274238	2.15734	12.2	708.444	6.71389	155.451	0.419007	2.29911	11.4	2018-06-18	874.298	6.16944	203.678	0.548996	2.82562	15.8833
2018	4	12	Beitem	1863.9	0	18	0								675.349	7.46944	141.375	0.381064	2.37983	12.2333	2018-06-25	673.11	11.4233	139.595	0.376267	4.18147	15.9833
2018	4	13	Beitem	2932.5	0	141	0	2018-04-13	1247.87	2.35	273.057	0.736004	1.72961	11	646.082	6.56667	150.494	0.405644	2.23707	12.66	2018-07-02	544.778	15	115.423	0.311112	4.66592	20.8333
2018	4	14	Beitem	3343.2	0	314	0	2018-04-14	638.828	5.23333	139.787	0.376785	1.97184	10.8	781.109	5.11667	184.203	0.496504	2.04212	12.08	2018-07-09	532.371	13.1722	116.584	0.314243	4.12882	21.3833
2018	4	15	Beitem	3654.2	0	326	0	2018-04-15	672.552	5.43333	147.167	0.396676	2.15527	12.9	807.978	5.13	182.991	0.493237	2.03027	11.6	2018-07-16	563.957	11.3467	126.957	0.342202	#NAME?	19.1333
2018	4	16	Beitem	5187.1	0	593	0	2018-04-16	524.833	9.88333	114.843	0.30955	3.05939	11.1	808.983	5.81667	157.893	0.425587	2.16735	12.1	2018-07-23	597.982	10.2528	127.503	0.343673	3.38115	19.9833
2018	4	17	Beitem	6061.2	0	773	0	2018-04-17	470.468	12.8833	102.947	0.277485	3.57494	13.5	688.78	6.15333	155.319	0.418651	2.21469	11.6	2018-07-30	580.139	9.71944	130.465	0.351659	3.24851	24.1833
2018	4	18	Beitem	6082	0	799	0	2018-04-18	456.721	13.3167	99.9389	0.269377	3.58721	16.9	669.919	7.15667	155.56	0.4193	2.49821	11.86	2018-08-06	516.061	12.9667	111.484	0.300496	3.87818	21.6833
2018	4	19	Beitem	6027.2	0	804	0	2018-04-19	449.791	13.4	98.4225	0.26529	3.55488	18.2	668.546	8.18333	146.29	0.394313	2.67971	12.7	2018-08-20	770.749	5.43889	172.299	0.464418	2.28951	18.2167
2018	4	20	Beitem	6046	0	787	0	2018-04-20	460.94	13.1167	100.862	0.271866	3.56597	17.3	637.295	10.025	117.184	0.315861	2.98392	13.9	2018-08-27	860.606	5.13611	188.316	0.507591	2.10519	16.04
2018	4	21	Beitem	5833.7	0	748	0	2018-04-21	467.944	12.4667	102.395	0.275997	3.44076	16.4	524.876	11.3389	110.697	0.298374	3.24961	14.9833	2018-09-03	775.357	8.68667	123.826	0.333763	2.65241	15.6167
2018	4	22	Beitem	5831.6	0	679	0	2018-04-22	515.311	11.3167	112.759	0.303934	3.43952	18.2	500.464	12.5111	103.235	0.278261	3.46386	15.5667	2018-09-10	950.906	4.95	192.416	0.518641	1.99212	17.2
2018	4	23	Beitem	4892.6	0	572	0	2018-04-23	513.21	9.53333	112.3	0.302695	2.88569	11.7	478.001	12.75	102.887	0.277325	3.52721	16.75	2018-09-17	474.781	8.14	104.234	0.280953	2.17503	14.9
2018	4	24	Beitem	3008.5	0	103	0	2018-04-24	1752.52	1.71667	383.485	1.03365	1.77443	12.4	476.341	12.1917	104.446	0.281526	3.41234	16.45	2018-10-01	434.133	8.88056	95.2656	0.256781	2.17405	10.8
2018	4	25	Beitem	4518.6	0	364	0	2018-04-25	744.824	6.06667	162.981	0.439302	2.6651	12.1	659.492	10.2583	151.704	0.408905	3.11021	15.7	2018-10-08	412.699	8.05333	87.2802	0.235257	1.87793	13.5
2018	4	26	Beitem	5554.9	0	599	0	2018-04-26	556.417	9.98333	121.754	0.328179	3.27632	10.3	700.649	9.03611	162.464	0.437907	2.96191	14.6833	2018-04-30	845.013	6.85556	198.656	0.535461	2.67783	12.7
2018	4	27	Beitem	3434.9	0	151	0	2018-04-27	1364.86	2.51667	298.657	0.805004	2.02593	11.5	715.881	8.51389	165.946	0.447293	2.91364	13.5167	2018-05-07	526.58	11.7	115.225	0.310581	3.4409	12.3667
2018	4	28	Beitem	2988.2	0	80	0	2018-04-28	2241.15	1.33333	490.405	1.32185	1.76246	11.9	845.013	6.85556	198.656	0.535461	2.67783	12.7	2018-05-14	523.137	11.3583	117.486	0.316673	3.37616	16.0333
2018	4	29	Beitem	1179.9	0	0	0							9.5	1098.33	5.19167	261.597	0.705113	2.39832	11.65	2018-05-22	707.871	8.99333	157.818	0.425385	3.5	12.6
2018	4	30	Beitem	1276.5	0	10	0							8.6	1195.5	4.32333	291.456	0.785597	2.30085	11.2833	2018-05-28	844.251	7.46389	188.383	0.507771	3.11625	19.0667
2018	5	1	Beitem	4232.8	0	420	0	2018-05-01	604.686	7	132.316	0.356648	2.49653	8.7	1331.96	4.975	268.449	0.723583	2.43245	10.65	2018-06-04	862.003	6.12667	204.217	0.55045	2.7034	18.3
2018	5	2	Beitem	4632	0	409	1	2018-05-02	679.511	6.81667	148.689	0.40078	2.73199	10.1	1102.39	5.20833	260.783	0.702919	2.39031	10.0833	2018-06-11	1037.48	6.82222	225.754	0.608501	3.0232	17.0167
2018	5	3	Beitem	6294.9	0	685	1	2018-05-03	551.378	11.4167	120.652	0.325207	3.71278	10.2	1089.33	4.41667	267.517	0.72107	2.25423	10.05	2018-06-18	874.298	6.16944	203.678	0.548996	2.82562	15.8833
2018	5	4	Beitem	6538.5	0	896	1	2018-05-04	437.846	14.9333	95.8087	0.258245	3.85645	11.4	1088.32	6.64167	223.016	0.60112	2.67594	9.83333	2018-06-25	673.11	11.4233	139.595	0.376267	4.18147	15.9833
2018	5	5	Beitem	6676	0	899	1	2018-05-05	445.562	14.9833	97.4971	0.262795	3.93755	15.7	902.914	10.0417	124.367	0.33522	3.19944	9.75	2018-07-02	544.778	15	115.423	0.311112	4.66592	20.8333
2018	5	6	Beitem	6629.5	0	903	1	2018-05-06	440.498	15.05	96.3891	0.259809	3.91013	18.1	543.797	11.03	118.993	0.320735	3.34706	10.7833	2018-07-09	532.371	13.1722	116.584	0.314243	4.12882	21.3833
2018	5	7	Beitem	6578	0	906	1	2018-05-07	435.629	15.1	95.3237	0.256937	3.87975	19.6	526.58	11.7	115.225	0.310581	3.4409	12.3667	2018-07-16	563.957	11.3467	126.957	0.342202	3.71812	19.1333
2018	5	8	Beitem	6305.4	0	896	1	2018-05-08	422.237	14.9333	92.3931	0.249038	3.71897	19.1	513.587	13.05	109.06	0.293962	3.67144	14.1833	2018-07-23	597.982	10.2528	127.503	0.343673	3.38115	19.9833
2018	5	9	Beitem	5879.3	0	762	1	2018-05-09	462.937	12.7	101.299	0.273043	3.46765	15.5	487.523	14.4028	99.6772	0.268672	3.83594	15.6833	2018-07-30	580.139	9.71944	130.465	0.351659	3.24851	24.1833
2018	5	10	Beitem	4498.4	0	461	0	2018-05-10	585.475	7.68333	128.113	0.345317	2.65319	12.1	456.584	14.6167	96.4518	0.259978	3.79508	16.5667	2018-10-08	412.699	8.05333	87.2802	0.235257	1.87793	13.5
2018	5	11	Beitem	6284.6	0	689	1	2018-05-11	547.28	11.4833	119.755	0.32279	3.7067	13.8	461.455	13.4083	101.836	0.27449	3.59454	16.6833	2018-04-30	845.013	6.85556	198.656	0.535461	2.67783	12.7
2018	5	12	Beitem	4799.4	0	375	0	2018-05-12	767.904	6.25	168.032	0.452915	2.83072	16.1	477.088	12.825	105.545	0.284489	3.55606	16.3667	2018-05-07	526.58	11.7	115.225	0.310581	3.4409	12.3667
2018	5	13	Beitem	2525	0	141	0	2018-05-13	1074.47	2.35	235.113	0.633729	1.48926	11.9	523.137	11.3583	117.486	0.316673	3.37616	16.0333	2018-05-14	523.137	11.3583	117.486	0.316673	3.37616	16.0333
2018	5	14	Beitem	1412.1	0	0	0							11.5	613.704	9.23333	140.784	0.379472	2.97775	14.75	2018-05-22	707.871	8.99333	157.818	0.425385	3.5	12.6
2018	5	15	Beitem	5203.5	0	487	0	2018-05-15	641.088	8.11667	140.282	0.378118	3.06906	13.6	643.383	8.09333	150.462	0.405559	2.8295	13.4833	2018-05-28	844.251	7.46389	188.383	0.507771	3.11625	19.0667
2018	5	16	Beitem	3616.1	0	209	0	2018-05-16	1038.11	3.48333	227.159	0.612287	2.1328	12.5	679.859	7.17667	158.259	0.426574	2.74979	13.1667	2018-06-18	874.298	6.16944	203.678	0.548996	2.82562	15.8833
2018	5	17	Beitem	7050.9	0	757	0	2018-05-17	558.856	12.6167	122.288	0.329617	4.15867	10.8	775.722	6.33667	178.068	0.479968	2.64571	13.2333	2018-06-25	673.11	11.4233	139.595	0.376267	4.18147	15.9833
2018	5	18	Beitem	7120	0	651	0	2018-05-18	656.221	10.85	143.593	0.387044	4.19943	10.1	771.285	6.56333	178.575	0.481333	2.7361	12.7333	2018-07-02	544.778	15	115.423	0.311112	4.66592	20.8333
2018	5	19	Beitem	1859.2	0	0	0							10.3	789.442	7.48333	173.687	0.468159	3.00984	11.7333	2018-07-09	532.371	13.1722	116.584	0.314243	4.12882	21.3833
2018	5	20	Beitem	6847.3	0	675	0	2018-05-20	608.649	11.25	133.184	0.358985	4.03859	14.1	793.75	8.76667	158.33	0.426767	3.38999	11.4667	2018-07-16	563.957	11.3467	126.957	0.342202	3.71812	19.1333
2018	5	21	Beitem	5036.4	0	406	0	2018-05-21	744.296	6.76667	162.866	0.438991	2.9705	17.8	700.586	9.26333	153.301	0.41321	3.51971	11.9	2018-07-23	597.982	10.2528	127.503	0.343673	3.38115	19.9833
2018	5	22	Beitem	7054.8	0	666	0	2018-05-22	635.568	11.1	139.074	0.374862	4.16097	17.6	707.871	8.99333	157.818	0.425385	3.5	12.6	2018-07-30	580.139	9.71944	130.465	0.351659	3.24851	24.1833
2018	5	23	Beitem	3245.8	0	115	0	2018-05-23	1693.46	1.91667	370.56	0.998815	1.9144	16.2	706.951	10.5167	140.201	0.3779	3.90563	13.45	2018-08-06	516.061	12.9667	111.484	0.300496	3.87818	21.6833
2018	5	24	Beitem	4458.9	0	292	0	2018-05-24	916.212	4.86667	200.484	0.540388	2.62989	18.5	816.175	8.37667	189.855	0.511739	3.45678	14.35	2018-08-27	860.606	5.13611	188.316	0.507591	2.10519	16.04
2018	5	25	Beitem	4739.2	0	415	0	2018-05-25	685.186	6.91667	149.931	0.404127	2.79521	17.2	875.734	7.18	201.233	0.542408	3.14287	15.75	2018-09-03	775.357	8.68667	123.826	0.333763	2.65241	15.6167
2018	5	26	Beitem	7011.7	0	721	0	2018-05-26	583.498	12.0167	127.68	0.344151	4.13555	22.2	880.562	7.13611	192.683	0.519361	3.08493	16.9	2018-09-10	950.906	4.95	192.416	0.518641	1.99212	17.2
2018	5	27	Beitem	5190.6	0	478	0	2018-05-27	651.54	7.96667	142.569	0.384283	3.06145	22.7	838.124	7.26389	191.766	0.516889	3.10109	18.25	2018-09-17	474.781	8.14	104.234	0.280953	2.17503	14.9
2018	5	28	Beitem	6480.9	0	769	0	2018-05-28	505.662	12.8167	110.648	0.298243	3.82248	23.1	844.251	7.46389	188.383	0.507771	3.11625	19.0667	2018-10-08	412.699	8.05333	87.2802	0.235257	1.87793	13.5
2018	5	29	Beitem	3585.5	0	181	0	2018-05-29	1188.56	3.01667	260.08	0.701023	2.11475	19.1	810.161	7.75	183.645	0.495001	3.05983	19.9833
2018	5	30	Beitem	4859	0	426	0	2018-05-30	684.366	7.1	149.752	0.403644	2.86587	19.7	889.16	7.93333	165.232	0.445369	3.09322	20.4667
2018	5	31	Beitem	4326.8	0	298	0	2018-05-31	871.168	4.96667	190.628	0.513821	2.55198	19.3	745.004	8.30556	156.777	0.422578	3.13255	20.6667
2018	6	1	Beitem	1991.4	0	0	0							16.7	738.569	7.98056	163.559	0.440861	3.09201	21.0167
2018	6	2	Beitem	3298.1	0	141	0	2018-06-02	1403.45	2.35	307.1	0.827763	1.94524	16.6	747.466	7.17333	170.735	0.460203	2.88331	20.1
2018	6	3	Beitem	6848.3	0	792	0	2018-06-03	518.811	13.2	113.525	0.305998	4.03917	18.4	884.124	6.05	203.641	0.548899	2.66006	19.0833
2018	6	4	Beitem	3681.2	0	206	0	2018-06-04	1072.19	3.43333	234.616	0.632388	2.1712	15.9	862.003	6.12667	204.217	0.55045	2.7034	18.3
2018	6	5	Beitem	2883.2	1	93	1	2018-06-05	1860.13	1.55	407.03	1.09712	1.70053	15.4	956.425	6.21	199.124	0.536723	2.71469	17.7667
2018	6	6	Beitem	7204.1	0	794	0	2018-06-06	544.39	13.2333	119.123	0.321085	4.24903	17.8	1068.35	5.1	250.58	0.675417	2.48162	17.05
2018	6	7	Beitem	5846.2	0	471	0	2018-06-07	744.739	7.85	162.963	0.439252	3.44813	18.1	1045.02	6.75333	236.279	0.63687	2.82103	16.8
2018	6	8	Beitem	5060	0	427	0	2018-06-08	711.007	7.11667	155.581	0.419357	2.98442	16	1023.95	6.93611	224.059	0.603934	2.92555	17.0333
2018	6	9	Beitem	3365.3	0	124	0	2018-06-09	1628.37	2.06667	356.317	0.960425	1.98488	16.9	979.245	7.73056	198.806	0.535866	3.09875	16.9333
2018	6	10	Beitem	6395.7	0	547	0	2018-06-10	701.539	9.11667	153.51	0.413773	3.77223	17.9	1011.38	5.875	239.272	0.644937	2.75636	16.6833
2018	6	11	Beitem	6744.1	0	756	0	2018-06-11	535.246	12.6	117.122	0.315692	3.97772	18.8	1037.48	6.82222	225.754	0.608501	3.0232	17.0167
2018	6	12	Beitem	3433.9	0	194	0	2018-06-12	1062.03	3.23333	232.392	0.626393	2.02534	15.4	960.775	8.66389	177.436	0.478264	3.40273	17.5833
2018	6	13	Beitem	5630	0	461	0	2018-06-13	732.755	7.68333	160.34	0.432184	3.32061	15.7	846.761	6.99722	196.314	0.529149	3.03212	17.1833
2018	6	14	Beitem	2947.7	0	221	0	2018-06-14	800.281	3.68333	175.116	0.472011	1.73857	15.5	873.67	6.96944	195.877	0.527971	3.01087	16.7833
2018	6	15	Beitem	6847.8	0	726	0	2018-06-15	565.934	12.1	123.837	0.333792	4.03888	16.7	881.604	6.39722	199.133	0.536746	2.80322	16.7
2018	6	16	Beitem	5837.6	0	475	0	2018-06-16	737.381	7.91667	161.353	0.434912	3.44306	16.1	860.88	8.06944	160.386	0.432307	3.14556	16.6667
2018	6	17	Beitem	4047.5	0	144	0	2018-06-17	1686.46	2.4	369.028	0.994685	2.38724	15.9	733.595	7.86944	161.693	0.435831	3.0907	16.3667
2018	6	18	Beitem	3240	0	229	0	2018-06-18	848.908	3.81667	185.757	0.500692	1.91097	16.7	874.298	6.16944	203.678	0.548996	2.82562	15.8833
2018	6	19	Beitem	1967.3	0	0	0							17.8	919.107	6.26667	195.905	0.528046	2.80656	16.1
2018	6	20	Beitem	5640.2	0	437	0	2018-06-20	774.398	7.28333	169.453	0.456745	3.32663	19.2	895.286	5.98333	203.018	0.547218	2.70375	16.45
2018	6	21	Beitem	6837	0	603	0	2018-06-21	680.299	10.05	148.862	0.401245	4.03251	14.5	902.227	6.70333	201.885	0.544165	3.02136	17.0667
2018	6	22	Beitem	8425.6	0	885	0	2018-06-22	571.227	14.75	124.995	0.336914	4.96948	13.5	882.23	6.29333	206.89	0.557656	3.02008	16.7
2018	6	23	Beitem	7223.1	0	719	0	2018-06-23	602.762	11.9833	131.895	0.355513	4.26023	15.3	883.112	7.66	199.619	0.538056	3.32537	16.2667
2018	6	24	Beitem	7321.9	0	783	0	2018-06-24	561.065	13.05	122.771	0.33092	4.31851	15.6	860.675	9.57667	152.192	0.410222	3.69997	16.1667
2018	6	25	Beitem	6853.1	0	634	0	2018-06-25	648.558	10.5667	141.916	0.382524	4.04201	17.7	673.11	11.4233	139.595	0.376267	4.18147	15.9833
2018	6	26	Beitem	8154.3	0	885	0	2018-06-26	552.834	14.75	120.97	0.326065	4.80946	17.5	639.718	11.2806	139.982	0.37731	4.15823	15.9667
2018	6	27	Beitem	8048.6	0	908	0	2018-06-27	531.846	15.1333	116.378	0.313686	4.74712	18.8	627.306	12.525	131.902	0.35553	4.40537	15.6833
2018	6	28	Beitem	7682.5	0	896	0	2018-06-28	514.453	14.9333	112.572	0.303428	4.53119	21.8	592.656	13.3722	126.488	0.340937	4.52447	16.4
2018	6	29	Beitem	8031	0	914	0	2018-06-29	527.199	15.2333	115.361	0.310946	4.73674	20.4	568.964	13.4028	124.417	0.335356	4.45142	17.7833
2018	6	30	Beitem	7800.9	0	887	0	2018-06-30	527.682	14.7833	115.467	0.311231	4.60103	22.2	562.674	13.9444	121.661	0.327928	4.53084	18.6333
2018	7	1	Beitem	7748.3	0	910	0	2018-07-01	510.877	15.1667	111.789	0.301319	4.57	24.3	551.948	14.2333	120.444	0.324647	4.57792	19.7333
2018	7	2	Beitem	8124.4	0	920	0	2018-07-02	529.852	15.3333	115.941	0.31251	4.79183	22.9	544.778	15	115.423	0.311112	4.66592	20.8333
2018	7	3	Beitem	6984.2	0	847	0	2018-07-03	494.749	14.1167	108.26	0.291806	4.11933	21.3	527.82	15.0972	114.585	0.308853	4.66298	21.7333
2018	7	4	Beitem	7295.7	0	817	0	2018-07-04	535.792	13.6167	117.241	0.316014	4.30305	21.4	519.523	14.9278	113.232	0.305207	4.55835	22.15
2018	7	5	Beitem	7316.9	0	807	0	2018-07-05	544.007	13.45	119.039	0.320859	4.31556	20.3	520.086	14.7083	114.01	0.307304	4.52033	22.0833
2018	7	6	Beitem	6586.3	0	798	0	2018-07-06	495.211	13.3	108.361	0.292079	3.88465	21.3	524.308	14.4111	114.623	0.308957	4.45013	22.0667
2018	7	7	Beitem	6623.5	0	750	0	2018-07-07	529.88	12.5	115.947	0.312527	3.90659	22.4	519.739	14.1639	113.439	0.305765	4.33074	21.9167
2018	7	8	Beitem	7195.1	0	723	0	2018-07-08	597.104	12.05	130.657	0.352176	4.24372	21.6	520.053	13.7194	114.132	0.307633	4.22017	21.6
2018	7	9	Beitem	6541.6	0	813	0	2018-07-09	482.775	13.55	105.64	0.284744	3.85828	19.9	532.371	13.1722	116.584	0.314243	4.12882	21.3833
2018	7	10	Beitem	1819.2	0	8	0							16	525.645	13.0778	116.148	0.313066	4.08531	21.15
2018	7	11	Beitem	3788.6	0	325	0	2018-07-11	699.434	5.41667	153.049	0.412531	2.23454	17.8	530.795	12.97	115.929	0.312477	4.04176	20.25
2018	7	12	Beitem	6412	0	584	0	2018-07-12	658.767	9.73333	144.15	0.388545	3.78184	18.4	558.068	11.3633	122.731	0.330811	3.62556	19.8333
2018	7	13	Beitem	6573.1	0	730	0	2018-07-13	540.255	12.1667	118.218	0.318646	3.87686	19.2	577.195	10.65	129.889	0.350105	3.60499	19.35
2018	7	14	Beitem	7490.6	0	887	0	2018-07-14	506.692	14.7833	110.874	0.298851	4.41801	20.6	584.702	10.5833	130.343	0.351328	3.59905	18.8167
2018	7	15	Beitem	7255.5	0	878	0	2018-07-15	495.82	14.6333	108.495	0.292438	4.27934	22.8	580.838	11.13	126.386	0.340663	3.63391	18.65
2018	7	16	Beitem	5000.7	0	435	0	2018-07-16	689.752	7.25	150.93	0.40682	2.94945	22.8	563.957	11.3467	126.957	0.342202	3.71812	19.1333
2018	7	17	Beitem	6942.2	0	737	0	2018-07-17	565.172	12.2833	123.67	0.333343	4.09456	19.9	598.453	10.6639	130.953	0.352972	3.59001	20.2667
2018	7	18	Beitem	5350.2	0	633	0	2018-07-18	507.128	10.55	110.969	0.299108	3.15559	18.9	593.699	11.8083	126.056	0.339774	3.90001	20.6167
2018	7	19	Beitem	6976.9	0	838	0	2018-07-19	499.539	13.9667	109.308	0.294632	4.11502	20	566.227	11.9444	120.526	0.324868	3.79563	20.7
2018	7	20	Beitem	2792.4	0	223	0	2018-07-20	751.318	3.71667	164.402	0.443133	1.64698	19.3	543.48	12.2444	119.041	0.320865	3.83533	20.8333
2018	7	21	Beitem	6712.5	0	672	0	2018-07-21	599.33	11.2	131.144	0.353489	3.95908	20.5	573.632	10.4	127.962	0.344912	3.37349	20.6167
2018	7	22	Beitem	5621.6	0	588	0	2018-07-22	573.633	9.8	125.521	0.338333	3.31566	21.3	586.866	9.82778	131.737	0.355087	3.32011	20.2333
2018	7	23	Beitem	6899.5	0	856	0	2018-07-23	483.61	14.2667	105.823	0.285236	4.06937	24.2	597.982	10.2528	127.503	0.343673	3.38115	19.9833
2018	7	24	Beitem	6043.5	0	604	0	2018-07-24	600.348	10.0667	131.367	0.354089	3.5645	24.3	568.533	10.5833	124.528	0.335655	3.37695	20.7
2018	7	25	Beitem	5944.7	0	710	0	2018-07-25	502.369	11.8333	109.928	0.296301	3.50623	25.3	573.558	10.5028	127.928	0.344819	3.4451	21.6
2018	7	26	Beitem	6091.6	0	775	0	2018-07-26	471.608	12.9167	103.196	0.278158	3.59287	27.5	572.878	10.1472	128.031	0.345097	3.34364	22.4833
2018	7	27	Beitem	5205.5	0	527	0	2018-07-27	592.657	8.78333	129.684	0.349553	3.07024	26.8	568.888	11.6806	117.83	0.317601	3.66795	23.85
2018	7	28	Beitem	5901.5	0	601	0	2018-07-28	589.168	10.0167	128.921	0.347495	3.48075	20.2	546.222	11.2778	117.587	0.316945	3.51981	24.9
2018	7	29	Beitem	3859.7	0	282	0	2018-07-29	821.213	4.7	179.696	0.484357	2.27648	21	544.77	11.3139	118.153	0.318472	3.54733	24.7167
2018	7	30	Beitem	4462.8	0	482	0	2018-07-30	555.535	8.03333	121.561	0.327659	2.63219	22.2	580.139	9.71944	130.465	0.351659	3.24851	24.1833
2018	7	31	Beitem	5902.7	0	632	0	2018-07-31	560.383	10.5333	122.622	0.330518	3.48145	20.7	590.414	9.38056	128.831	0.347254	3.09312	23.8333
2018	8	1	Beitem	6631.2	0	782	0	2018-08-01	508.788	13.0333	111.332	0.300087	3.91113	20.7	584.705	9.16389	130.947	0.352957	3.089	23.0667
2018	8	2	Beitem	6987.6	0	861	0	2018-08-02	486.941	14.35	106.552	0.287201	4.12134	21.6	585.622	9.18333	132.303	0.356611	3.14204	21.9333
2018	8	3	Beitem	6873.4	0	861	0	2018-08-03	478.983	14.35	104.81	0.282507	4.05398	23.1	587.812	10.1111	128.447	0.346219	3.31722	21.0667
2018	8	4	Beitem	6114.3	0	735	0	2018-08-04	499.127	12.25	109.218	0.294388	3.60626	22.1	571.573	10.8333	124.429	0.335388	3.41276	21.55
2018	8	5	Beitem	6942.8	0	797	0	2018-08-05	522.67	13.2833	114.37	0.308274	4.09491	21.9	558.71	12.0917	112.683	0.303727	3.63439	21.7333
2018	8	6	Beitem	6755.5	0	851	0	2018-08-06	476.298	14.1833	104.223	0.280924	3.98444	23.6	516.061	12.9667	111.484	0.300496	3.87818	21.6833
2018	8	7	Beitem	5119.4	0	554	0	2018-08-07	554.448	9.23333	121.323	0.327017	3.01946	24.9	504.741	13.575	108.417	0.29223	3.96201	22.1667
2018	8	8	Beitem	4687	0	486	0	2018-08-08	578.642	8.1	126.618	0.341287	2.76443	19.8	503.893	12.9417	110.083	0.296719	3.8134	22.8667
2018	8	9	Beitem	1190.7	0	8	0							16.7	513.873	11.9	113.427	0.305733	3.58725	22.5667
2018	8	10	Beitem	4603.2	0	457	0	2018-08-10	604.359	7.61667	132.245	0.356455	2.715	16	518.361	11.41	115.15	0.310378	3.4939	21.5
2018	8	11	Beitem	5642.4	0	653	0	2018-08-11	518.444	10.8833	113.445	0.305782	3.32793	16.8	539.257	10.4833	119.756	0.322792	3.31565	20.4833
2018	8	12	Beitem	4997.5	0	447	0	2018-08-12	670.805	7.45	146.785	0.395646	2.94756	21.2	542.477	10.0033	119.571	0.322293	3.16225	19.6333
2018	8	13	Beitem	3222.9	0	215	0	2018-08-13	899.414	3.58333	196.808	0.530481	1.90089	18.3	567.166	8.65667	128.083	0.345237	2.95487	19.2333
2018	8	14	Beitem	4080.1	0	240	0	2018-08-14	1020.02	4	223.2	0.601618	2.40647	18.8	637.685	7.52667	143.18	0.38593	2.73116	18.1333
2018	8	15	Beitem	2754.3	0	253	0	2018-08-15	653.194	4.21667	142.931	0.385258	1.62451	18.5	715.282	6.70667	162.497	0.437996	2.65957	17.9667
2018	8	16	Beitem	4237	0	355	0	2018-08-16	716.113	5.91667	156.699	0.422368	2.49901	19.1	727.707	6.29167	159.236	0.429207	2.48706	18.2667
2018	8	17	Beitem	5930.4	0	696	0	2018-08-17	511.241	11.6	111.869	0.301534	3.49779	17.5	726.051	6.00833	163.311	0.440192	2.45106	18.7833
2018	8	18	Beitem	3066.1	0	199	0	2018-08-18	924.452	3.31667	202.287	0.545248	1.80841	17.1	712.748	6.12778	163.049	0.439484	2.47937	18.9
2018	8	19	Beitem	4089.7	1	279	1	2018-08-19	879.505	4.65	192.452	0.518738	2.41213	18.7	770.749	5.43889	172.299	0.464418	2.28951	18.2167
2018	8	20	Beitem	2151.6	1	17	1							19.9	800.563	5.61667	171.573	0.462461	2.37472	18.2833
2018	8	21	Beitem	3978.8	1	385	1	2018-08-21	620.073	6.41667	135.683	0.365723	2.34672		784.088	5.94	161.247	0.434629	2.36837	18.4667
2018	8	22	Beitem	2705.8	1	221	1	2018-08-22	734.606	3.68333	160.745	0.433276	1.5959	18.4	717.43	6.38	159.798	0.430722	2.51281	18.46
2018	8	23	Beitem	2892.5	0	108	0	2018-08-23	1606.94	1.8	351.629	0.947787	1.70602	18.5	730.998	5.93333	160.607	0.432904	2.33219	18.32
2018	8	24	Beitem	4718.2	0	495	0	2018-08-24	571.903	8.25	125.143	0.337312	2.78283	15.9	879.47	3.97333	208.559	0.562155	1.97384	18.52
2018	8	25	Beitem	4498.8	0	495	0	2018-08-25	545.309	8.25	119.324	0.321627	2.65342	13.3	889.581	4.96	193.13	0.520567	2.16872	18.28
2018	8	26	Beitem	2621.6	0	145	0	2018-08-26	1084.8	2.41667	237.374	0.639823	1.54624	14.1	826.39	5.68	178.505	0.481145	2.21698	17.2
2018	8	27	Beitem	2703.7	0	89	0	2018-08-27	1822.72	1.48333	398.844	1.07505	1.59466	17.1	860.606	5.13611	188.316	0.507591	2.10519	16.04
2018	8	28	Beitem	3898.9	0	332	0	2018-08-28	704.62	5.53333	154.184	0.41559	2.2996	17.1	998.051	4.31389	232.177	0.625813	1.97984	16.2167
2018	8	29	Beitem	739.3	0	0	0							14.8	1010.13	4.62222	231.083	0.622865	2.09713	16
2018	8	30	Beitem	3275.5	0	265	0	2018-08-30	741.623	4.41667	162.281	0.437414	1.93191	15.6	1056.05	5.18667	206.974	0.557881	2.17535	15.3833
2018	8	31	Beitem	4219.1	0	513	0	2018-08-31	493.462	8.55	107.979	0.291047	2.48845	15.2	911.829	4.42	214.401	0.577901	2.00517	15.3333
2018	9	1	Beitem	5579	0	749	0	2018-09-01	446.916	12.4833	97.7934	0.263594	3.29053	14.7	898.756	4.48	212.132	0.571785	1.97217	15.65
2018	9	2	Beitem	5512.9	0	747	0	2018-09-02	442.803	12.45	96.8935	0.261168	3.25155	16.3	882.357	6.49333	184.216	0.49654	2.32103	15.75
2018	9	3	Beitem	2323.5	0	101	0	2018-09-03	1380.3	1.68333	302.034	0.814109	1.37042	17.2	775.357	8.68667	123.826	0.333763	2.65241	15.6167
2018	9	4	Beitem	2251.6	0	92	0	2018-09-04	1468.43	1.53333	321.321	0.866093	1.32801	18.9	701.62	7.91667	153.396	0.413467	2.46657	15.6333
2018	9	5	Beitem	2271.5	0	98	0	2018-09-05	1390.71	1.63333	304.314	0.820253	1.33975	19.4	828.923	6.85278	181.383	0.488904	2.27681	16.3167
2018	9	6	Beitem	3277.1	0	313	0	2018-09-06	628.198	5.21667	137.461	0.370516	1.93286	17.3	909.179	6.38889	205.056	0.552711	2.17812	16.95
2018	9	7	Beitem	4765.1	0	552	0	2018-09-07	517.946	9.2	113.336	0.305488	2.81049	14.4	892.975	5.83333	209.969	0.565955	2.08552	17.3
2018	9	8	Beitem	3740	0	358	0	2018-09-08	626.816	5.96667	137.159	0.3697	2.20588	14.9	896.473	5.28611	212.56	0.572938	2.00551	17.25
2018	9	9	Beitem	3960.2	0	369	0	2018-09-09	643.935	6.15	140.905	0.379797	2.33575	18.3	922.173	4.20556	219.271	0.591026	1.83123	17.0167
2018	9	10	Beitem	4078	0	524	0	2018-09-10	466.947	8.73333	102.176	0.275408	2.40523	16.8	950.906	4.95	192.416	0.518641	1.99212	17.2
2018	9	11	Beitem	4967.6	0	695	0	2018-09-11	428.858	11.5833	93.8419	0.252943	2.92993	18.6	820.427	6.15	155.892	0.420194	2.17166	16.85
2018	9	12	Beitem	1201.8	0	12	0							15.5	671.916	7.80833	120.813	0.325642	2.43669	16.7167
2018	9	13	Beitem	3225.3	0	296	0	2018-09-13	653.777	4.93333	143.058	0.385602	1.9023	14.2	552.116	8.32667	117.484	0.316667	2.53746	16.4167
2018	9	14	Beitem	2856.1	0	362	0	2018-09-14	473.387	6.03333	103.586	0.279207	1.68455	12.6	556.38	7.47333	123.428	0.33269	2.35582	16.3833
2018	9	15	Beitem	3662.5	0	478	0	2018-09-15	459.728	7.96667	100.597	0.271151	2.16017	14.1	548.953	7.48667	116.713	0.314592	2.25155	16
2018	9	16	Beitem	3727	0	611	0	2018-09-16	365.99	10.1833	80.0854	0.215864	2.19821	14.4	521.105	7.85	108.652	0.292862	2.21644	15.3
2018	9	17	Beitem	4516.7	0	700	0	2018-09-17	387.146	11.6667	84.7146	0.228341	2.66398	17.3	474.781	8.14	104.234	0.280953	2.17503	14.9
2018	9	18	Beitem	4072.4	0	546	0	2018-09-18	447.516	9.1	97.9248	0.263948	2.40193	18.6	461.481	8.15667	102.408	0.276033	2.12184	14.6833
2018	9	19	Beitem	3599.3	0	434	0	2018-09-19	497.599	7.23333	108.884	0.293487	2.12289	18.8	464.591	8.31389	101.661	0.274019	2.16852	15.2
2018	9	20	Beitem	3341.8	0	499	0	2018-09-20	401.82	8.31667	87.9255	0.236996	1.97102	19.4	469.306	8.69722	95.9652	0.258666	2.20529	15.9667
2018	9	21	Beitem	3554.6	0	406	0	2018-09-21	525.31	6.76667	114.948	0.309832	2.09653	15.6	433.312	9.07778	93.3552	0.251631	2.25303	17.1
2018	9	22	Beitem	1293.8	0	3	0							11.6	440.73	8.87778	95.747	0.258078	2.24243	17.35
2018	9	23	Beitem	1194.5	0	53	0							11.1	437.564	8.61667	98.8793	0.266521	2.25127	16.8833
2018	9	24	Beitem	3926.1	0	552	0	2018-09-24	426.75	9.2	93.3807	0.2517	2.31564	10.6	451.878	7.85417	102.42	0.276066	2.14809	15.85
2018	9	25	Beitem	3573.9	0	472	0	2018-09-25	454.309	7.86667	99.4112	0.267955	2.10791	9.3	459.799	7.87917	101.284	0.273004	2.12652	14.5167
2018	9	26	Beitem	4302.2	0	658	0	2018-09-26	392.298	10.9667	85.842	0.23138	2.53747	11.4	461.158	8.0375	98.9163	0.266621	2.12277	12.9333
2018	9	27	Beitem	4289.7	0	662	0	2018-09-27	388.795	11.0333	85.0754	0.229314	2.53009	12.3	440.097	8.7	98.3954	0.265217	2.26439	11.6
2018	9	28	Beitem	2553.6	0	256	0	2018-09-28	598.5	4.26667	130.963	0.352999	1.50613	12.5	437.492	9.76667	90.9273	0.245087	2.37278	11.05
2018	9	29	Beitem	4005.4	0	653	0	2018-09-29	368.031	10.8833	80.5319	0.217067	2.36241	9.4	452.13	8.66667	98.9344	0.26667	2.19945	11.2
2018	9	30	Beitem	3391.4	0	496	0	2018-09-30	410.25	8.26667	89.7702	0.241968	2.00027	9.9	438.114	9.03611	95.8673	0.258403	2.22661	10.9167
2018	10	1	Beitem	3091.8	0	385	0	2018-10-01	481.839	6.41667	105.435	0.284192	1.82357	10.6	434.133	8.88056	95.2656	0.256781	2.17405	10.8
2018	10	2	Beitem	1391.1	0	47	0							13.2	442.003	8.63889	96.2696	0.259487	2.12666	11.0167
2018	10	3	Beitem	2998.9	0	410	0	2018-10-03	438.863	6.83333	96.0314	0.258845	1.76877	13.9	439.952	8.17333	98.3551	0.265108	2.0445	11.3167
2018	10	4	Beitem	3198.3	0	488	0	2018-10-04	393.234	8.13333	86.0467	0.231932	1.88638	14	447.713	7.33333	100.546	0.271014	1.89223	11.5833
2018	10	5	Beitem	3736.6	0	620	0	2018-10-05	361.606	10.3333	79.1261	0.213278	2.20387	14	448.453	8.10667	91.5631	0.246801	1.96828	11.8333
2018	10	6	Beitem	2865.6	0	456	0	2018-10-06	377.053	7.6	82.506	0.222388	1.69015	14.4	408.971	7.99667	91.2819	0.246043	1.93657	12.6
2018	10	7	Beitem	3120.5	0	442	0	2018-10-07	423.597	7.36667	92.6909	0.249841	1.84049	11.5	410.474	7.86333	89.8291	0.242127	1.87455	13.35
2018	10	8	Beitem	3188.4	0	568	0	2018-10-08	336.803	9.46667	73.6986	0.198649	1.88054	9.9	412.699	8.05333	87.2802	0.235257	1.87793	13.5
2018	10	9	Beitem	3236.6	0	588	0	2018-10-09	330.265	9.8	72.2681	0.194793	1.90897	12	388.526	8.28889	85.0166	0.229155	1.87837	12.95
2018	10	10	Beitem	3276.7	0	610	0	2018-10-10	322.298	10.1667	70.5248	0.190094	1.93262	15.3	380.203	8.78333	81.0561	0.21848	1.90173	12.6333
2018	10	11	Beitem	3192.8	0	528	0	2018-10-11	362.818	8.8	79.3913	0.213993	1.88314	18.9	363.551	9.12222	78.4691	0.211507	1.90944	12.85
2018	10	12	Beitem	2555	0	448	0	2018-10-12	342.188	7.46667	74.8769	0.201825	1.50696	17.9	359.206	8.86667	78.5133	0.211626	1.85598	13.6667
2018	10	13	Beitem	2873.9	0	537	0	2018-10-13	321.106	8.95	70.2639	0.189391	1.69505	20.1	356.432	8.84444	77.2418	0.208199	1.82545	14.25
2018	10	14	Beitem	2851.5	0	570	0	2018-10-14	300.158	9.5	65.6801	0.177035	1.68183	18.1	348.439	9.10833	73.504	0.198124	1.80121	15.6833
2018	10	15	Beitem	2494.7	0	529	0	2018-10-15	282.953	8.81667	61.9153	0.166887	1.47139	17.6	330.805	9.11389	72.1675	0.194522	1.76809	17.05
2018	10	16	Beitem	2833.3	0	575	0	2018-10-16	295.649	9.58333	64.6934	0.174376	1.6711	16	323.112	8.95	70.442	0.189871	1.69516	17.9833
2018	10	17	Beitem	2390.9	0	423	0	2018-10-17	339.135	7.05	74.2089	0.200024	1.41017	13.3	318.167	8.85278	69.4701	0.187251	1.65158	18.1
2018	10	18	Beitem	1170.1	0	30	0	2018-10-18	2340.2	0.5	512.079	1.38027	0.690133	12.8	320.572	8.56111	68.6064	0.184923	1.57275	17.1667
2018	10	19	Beitem	2250.6	0	352	0	2018-10-19	383.625	5.86667	83.9442	0.226265	1.32742	11.8	603.055	7.4	141.473	0.38133	1.43661	16.3167
2018	10	20	Beitem	2178.8	0	370	0	2018-10-20	353.319	6.16667	77.3127	0.20839	1.28507	8.3	608.975	6.88611	143.753	0.387476	1.37534	14.9333
2018	10	21	Beitem	2502.5	0	550	0	2018-10-21	273	9.16667	59.7374	0.161017	1.47599	10.8	613.577	6.33056	145.692	0.392701	1.30921	13.3
2018	10	22	Beitem	2376.7	0	376	0	2018-10-22	379.261	6.26667	82.9892	0.223691	1.40179	11.3	609.697	6.38889	145.329	0.391723	1.30998	12.1667
2018	10	23	Beitem	2274.1	0	413	0	2018-10-23	330.378	6.88333	72.2927	0.194859	1.34128	10.7	623.455	5.83611	148.379	0.399942	1.2651	11.3833
2018	10	24	Beitem	520.3	0	0	0	2018-10-24	#DIV/0!	0	#DIV/0!	#DIV/0!	#DIV/0!	14.1	628.417	5.80833	148.059	0.399081	1.25362	10.95
2018	10	25	Beitem	791.1	0	2	0	2018-10-25	23733	0.0333333	5193.22	13.9979	0.466596	11.5	#DIV/0!	5.725	#DIV/0!	#DIV/0!	#DIV/0!	11.1667
2018	10	26	Beitem	565.8	0	10	0	2018-10-26	3394.8	0.166667	742.845	2.00228	0.333713	9.1	#DIV/0!	4.75278	#DIV/0!	#DIV/0!	#DIV/0!	11.1167
2018	10	27	Beitem	1055.1	0	143	0	2018-10-27	442.699	2.38333	96.8707	0.261107	0.622305	5.2	#DIV/0!	3.75278	#DIV/0!	#DIV/0!	#DIV/0!	11.25
2018	10	28	Beitem	2448.4	0	524	0	2018-10-28	280.351	8.73333	61.346	0.165353	1.44408	4.6	#DIV/0!	2.62222	#DIV/0!	#DIV/0!	#DIV/0!	10.3167
